# Supplementary material
Source: publisher figshare collection journal article supplement (https://tandf.figshare.com/articles/dataset/_/11506287)
Supplement: Supplementary file 1 [file 2]

# Semiparametric Inference for the Functional Cox Model

Meiling Hao<sup>a</sup>, Kin-yat Liu<sup>b</sup>, Wei Xu<sup>c</sup> and Xingqiu Zhao<sup>d</sup>

<sup>a</sup>School of Statistics, University of International Business and Economics, Beijing, China

<sup>b</sup>Department of Mathematics and Statistics, The Hang Seng University of Hong Kong,

Hong Kong

<sup>c</sup>Dalla Lana School of Public Health, University of Toronto, Toronto, Canada

<sup>d</sup>Department of Applied Mathematics, The Hong Kong Polytechnic University, Hong Kong

## Supplementary Materials

### Appendix: Proofs

To show the theorems, we need some notations and lemmas. In the following, we will use  $c$  to denote different positive constants in different places, while  $a \lesssim b$  means  $a \leq cb$ , and  $a \gtrsim b$  means  $a \geq cb$ .

## A Notation

For ease of presentation, we introduce more notation related to the Fréchet derivatives. Let  $\mathcal{S}_n(\alpha)$  and  $\mathcal{S}_{n,\lambda}(\alpha)$  be the Fréchet derivatives of  $l_n(\alpha)$  and  $l_{n,\lambda}(\alpha)$ , respectively. Denote  $l(\alpha)$  as the asymptotic value of  $l_n(\alpha)$ , and  $l_\lambda(\alpha) = l(\alpha) - \lambda J(\beta, \beta)/2$ . Similarly, let  $\mathcal{S}(\alpha)$  and  $\mathcal{S}_\lambda(\alpha)$  be the Fréchet derivatives of  $l(\alpha)$  and  $l_\lambda(\alpha)$ , respectively. Let  $D$  be the Fréchet derivative

operator and  $\alpha_i = (\theta_i^\top, \beta_i(\cdot)), i = 1, 2, 3 \in \mathcal{H}$  be any direction. Then, we have

$$\begin{aligned}\mathcal{S}_{n,\lambda}(\alpha)\alpha_1 &= \frac{1}{n} \sum_{i=1}^n \Delta_i \left[ \eta_{\alpha_1}(W_i) - \frac{\sum_{j=1}^n \mathcal{Y}_j(Y_i) \exp\{\eta_\alpha(W_j)\} \eta_{\alpha_1}(W_j)}{\sum_{j=1}^n \mathcal{Y}_j(Y_i) \exp\{\eta_\alpha(W_j)\}} \right] - \lambda J(\beta, \beta_1) \\ &\equiv \mathcal{S}_n(\alpha)\alpha_1 - \lambda J(\beta, \beta_1),\end{aligned}$$

$$\begin{aligned}D\mathcal{S}_{n,\lambda}(\alpha)\alpha_1\alpha_2 &= -\frac{1}{n} \sum_{i=1}^n \Delta_i \left[ \frac{\sum_{j=1}^n \mathcal{Y}_j(Y_i) \exp\{\eta_\alpha(W_j)\} \eta_{\alpha_1}(W_j) \eta_{\alpha_2}(W_j)}{\sum_{j=1}^n \mathcal{Y}_j(Y_i) \exp\{\eta_\alpha(W_j)\}} \right. \\ &\quad \left. - \frac{\sum_{j=1}^n \mathcal{Y}_j(Y_i) \exp\{\eta_\alpha(W_j)\} \eta_{\alpha_1}(W_j) \sum_{j=1}^n \mathcal{Y}_j(Y_i) \exp\{\eta_\alpha(W_j)\} \eta_{\alpha_2}(W_j)}{[\sum_{j=1}^n \mathcal{Y}_j(Y_i) \exp\{\eta_\alpha(W_j)\}]^2} \right] - \lambda J(\beta_1, \beta_2) \\ &\equiv D\mathcal{S}_n(\alpha)\alpha_1\alpha_2 - \lambda J(\beta_1, \beta_2),\end{aligned}$$

and

$$\begin{aligned}D^2\mathcal{S}_{n,\lambda}(\alpha)\alpha_1\alpha_2\alpha_3 &= -\frac{1}{n} \sum_{i=1}^n \Delta_i \left[ \frac{\sum_{j=1}^n \mathcal{Y}_j(Y_i) \exp\{\eta_\alpha(W_j)\} \eta_{\alpha_1}(W_j) \eta_{\alpha_2}(W_j) \eta_{\alpha_3}(W_j)}{\sum_{j=1}^n \mathcal{Y}_j(Y_i) \exp\{\eta_\alpha(W_j)\}} \right. \\ &\quad - \frac{\sum_{j=1}^n \mathcal{Y}_j(Y_i) \exp\{\eta_\alpha(W_j)\} \eta_{\alpha_1}(W_j) \eta_{\alpha_2}(W_j) \sum_{j=1}^n \mathcal{Y}_j(Y_i) \exp\{\eta_\alpha(W_j)\} \eta_{\alpha_3}(W_j)}{[\sum_{j=1}^n \mathcal{Y}_j(Y_i) \exp\{\eta_\alpha(W_j)\}]^2} \\ &\quad - \frac{\sum_{j=1}^n \mathcal{Y}_j(Y_i) \exp\{\eta_\alpha(W_j)\} \eta_{\alpha_1}(W_j) \eta_{\alpha_3}(W_j) \sum_{j=1}^n \mathcal{Y}_j(Y_i) \exp\{\eta_\alpha(W_j)\} \eta_{\alpha_2}(W_j)}{[\sum_{j=1}^n \mathcal{Y}_j(Y_i) \exp\{\eta_\alpha(W_j)\}]^2} \\ &\quad - \frac{\sum_{j=1}^n \mathcal{Y}_j(Y_i) \exp\{\eta_\alpha(W_j)\} \eta_{\alpha_2}(W_j) \eta_{\alpha_3}(W_j) \sum_{j=1}^n \mathcal{Y}_j(Y_i) \exp\{\eta_\alpha(W_j)\} \eta_{\alpha_1}(W_j)}{[\sum_{j=1}^n \mathcal{Y}_j(Y_i) \exp\{\eta_\alpha(W_j)\}]^2} \\ &\quad + 2 \frac{\sum_{j=1}^n \mathcal{Y}_j(Y_i) \exp\{\eta_\alpha(W_j)\} \eta_{\alpha_1}(W_j) \sum_{j=1}^n \mathcal{Y}_j(Y_i) \exp\{\eta_\alpha(W_j)\} \eta_{\alpha_2}(W_j)}{[\sum_{j=1}^n \mathcal{Y}_j(Y_i) \exp\{\eta_\alpha(W_j)\}]^3} \\ &\quad \left. \times \sum_{j=1}^n \mathcal{Y}_j(Y_i) \exp\{\eta_\alpha(W_j)\} \eta_{\alpha_3}(W_j) \right] \\ &\equiv D^2\mathcal{S}_n(\alpha)\alpha_1\alpha_2\alpha_3.\end{aligned}$$

There exists a sequence of functions  $\omega_k, k = 1, 2, \dots, p$ , such that  $\langle \omega_k, \beta \rangle_m = V(G_k, \beta)$ . Direct calculations yield that  $\omega_k(\cdot) = \sum_{j=1}^\infty G_{jk} h_j(\cdot) / (1 + \lambda \rho_j)$ . Denote  $\omega = (\omega_1, \omega_2, \dots, \omega_p)^\top$ . Thus,

$\omega = (id - W_\lambda)G$ . Furthermore, by the Riesz representation theorem, there exists an element in  $\mathcal{H}^{(m)}$ , denoted as  $\pi_x$ , such that  $\langle \pi_x, \beta \rangle_m = \int_{\mathbb{I}} x(t)\beta(t) dt$ . Through direct calculations, we have  $\pi_x = \sum_{j=1}^{\infty} \int_{\mathbb{I}} x(t)h_j(t) dt / (1 + \lambda\rho_j)h_j(\cdot)$ . Define  $\mathcal{R}_w = (H_w, T_w)$  with  $w = (z, x(\cdot))$ , where

$$H_w = \{\Sigma - V(G, G) + V(G, W_\lambda G)\}^{-1}\{z - V(G, \pi_x)\}, \quad \text{and}$$

$$T_w = \pi_x - \omega^\top \{\Sigma - V(G, G) + V(G, W_\lambda G)\}^{-1}\{z - V(G, \pi_x)\}.$$

Then we have  $\langle \mathcal{R}_w, \alpha \rangle_\lambda = \theta^\top z + \int_{\mathbb{I}} x(t)\beta(t) dt$ .

Also define  $\tilde{\mathcal{R}}_u$  as  $\tilde{\mathcal{R}}_u : u \rightarrow (\tilde{H}_u, \tilde{T}_u) \in \mathcal{H}$ , where  $u = (z^\top, t)$ ,

$$\tilde{H}_u = \{\Sigma - V(G, G) + V(G, W_\lambda G)\}^{-1}(z - \omega(t)), \quad \text{and}$$

$$\tilde{T}_u = K_t - \omega^\top \{\Sigma - V(G, G) + V(G, W_\lambda G)\}^{-1}(z - \omega(t)).$$

Then we have that  $\langle \tilde{\mathcal{R}}_u, \alpha \rangle_\lambda = \theta^\top z + \beta(t)$ .

Define  $\mathcal{P}_\lambda \alpha = (\tilde{H}_\alpha, \tilde{T}_\alpha)$ , where

$$\tilde{H}_\alpha = -\{\Sigma - V(G, G) + V(G, W_\lambda G)\}^{-1}V(G, W_\lambda \beta), \quad \text{and}$$

$$\tilde{T}_\alpha = W_\lambda \beta - \{\Sigma - V(G, G) + V(G, W_\lambda G)\}^{-1}V(G, W_\lambda \beta).$$

Then  $\mathcal{P}_\lambda \alpha \in \mathcal{H}$  and  $\langle \mathcal{P}_\lambda \alpha, \alpha_1 \rangle_\lambda = \langle W_\lambda \beta, \beta_1 \rangle_m$  for any  $\alpha_1 = (\theta_1^\top, \beta_1) \in \mathcal{H}$ . It follows from the Cauchy-Schwarz inequality that  $\|\mathcal{P}_\lambda\|_\lambda \leq 1$  and  $\mathcal{P}_\lambda$  is self-adjoint.

## B Lemmas

**Lemma B.1** *Under Condition (C1), we have  $D\mathcal{S}_\lambda(\alpha_0) = -id$ , where  $id$  is the identity operator.*

This result directly follows from the definitions of the inner product and  $D\mathcal{S}_\lambda(\alpha_0)$ .

Denote  $\|\alpha\|_e = \|\theta\|_2 + \|\beta\|_{L_2}$ . The following lemma provides the relationship between the general Euclidean norm  $\|\cdot\|_e$  and the norm  $\|\cdot\|_\lambda$ .

**Lemma B.2** *There exists a constant  $\kappa > 0$  such that for any  $\alpha \in \mathcal{H}$ ,  $\|\alpha\|_e \leq \kappa h^{-(2a+1)/2} \|\alpha\|_\lambda$ .*

**Proof of Lemma B.2.** For any  $u = (z^\top, t)$ , direct calculations yield

$$\left\langle \tilde{\mathcal{R}}_u, \tilde{\mathcal{R}}_u \right\rangle_\lambda = \{z - \omega(t)\}^\top \{\Sigma - V(G, G) + V(G, W_\lambda G)\}^{-1} \{z - \omega(t)\} + K_t(t).$$

It follows from Condition (C3) that  $\{\Sigma - V(G, G)\}^{-1}$  is positive definite and  $V(G, W_\lambda G) \rightarrow 0$ . Let  $c$  denote the minimum eigenvalue of  $\{\Sigma - V(G, G) + V(G, W_\lambda G)\}$ . Then we have  $\{\Sigma - V(G, G) + V(G, W_\lambda G)\}^{-1} \leq c^{-1} \mathbf{1}$  with  $\mathbf{1}$  being the identity matrix. Thus, we have  $\{z - \omega(t)\}^\top \{\Sigma - V(G, G) + V(G, W_\lambda G)\}^{-1} \{z - \omega(t)\} \lesssim \|z - \omega(t)\|_2^2$ . Then we have

$$\left\langle \tilde{\mathcal{R}}_u, \tilde{\mathcal{R}}_u \right\rangle_\lambda \lesssim \|z - \omega(t)\|_2^2 + \|K_t\|_\lambda^2.$$

By the arguments in Cheng and Shang (2015, page 1379, lines 5-11), we have  $\sup_{t \in \mathbb{I}} |\omega(t)| = O(1)$ , and it follows from the definition of  $K_t$  that  $\|K_t\|_\lambda \lesssim h^{-(a+1/2)}$ . This implies that

$\|\tilde{\mathcal{R}}_u\|_\lambda \lesssim h^{-(a+1/2)}$ . Then, we have

$$\begin{aligned}
\|\alpha\|_e &= \|\theta\|_2 + \|\beta\|_{L_2} \leq \|\theta\|_2 + \|\beta\|_{\sup} \\
&= \sup_{\|z\|_2=1, t \in \mathbb{I}} |\beta(t) + \theta^\top z| = \sup_{\|z\|_2=1, t \in \mathbb{I}} \left\langle \tilde{\mathcal{R}}_u, \alpha \right\rangle_\lambda \\
&\leq \|\alpha\|_\lambda \sup_{\|z\|_2=1, t \in \mathbb{I}} |\tilde{\mathcal{R}}_u|_\lambda \\
&\lesssim h^{-(a+1/2)} \|\alpha\|_\lambda.
\end{aligned}$$

**Lemma B.3** *Suppose that Conditions (C1)–(C4) hold. Then for any  $\alpha \in \mathcal{H}$ ,*

$$E(|\langle \mathcal{R}_W, \alpha \rangle_\lambda|^4) \lesssim \|\alpha\|_\lambda^4.$$

**Proof of Lemma B.3.** By Conditions (C1) and (C4), we have

$$\begin{aligned}
E_W(\langle \mathcal{R}_W, \alpha \rangle_\lambda)^4 &= E_W \left\{ \theta^\top Z + \int_{\mathbb{I}} X(t) \beta(t) dt \right\}^4 \\
&\leq M_0 \left\{ E_W |\theta^\top Z + \int_{\mathbb{I}} X(t) \beta(t) dt|^2 \right\}^2 \\
&\lesssim \left\{ \int_0^\tau \text{Var}[\eta_\alpha(W) | T = v, \Delta = 1] E dN(v) \right\}^2 \lesssim \|\alpha\|_\lambda^4.
\end{aligned}$$

**Lemma B.4** *Suppose that Conditions (C1)–(C3) hold. Then for any  $x \in L_2([0, 1])$ , there exists a universal positive constant  $c_r$  such that*

$$\langle \mathcal{R}_{Z,x}, \mathcal{R}_{Z,x} \rangle_\lambda \leq c_r (\|Z\|_2^2 + \|x\|_{L_2}^2 h^{-2a-1}) \quad \text{and} \quad E\{\|\mathcal{R}_W\|_\lambda^2\} \leq c_r h^{-1}.$$

**Proof of Lemma B.4.** Direct calculations yield that

$$\begin{aligned}
\langle \mathcal{R}_w, \mathcal{R}_w \rangle_\lambda &= z^\top \{\Sigma - V(G, G) + V(G, W_\lambda G)\}^{-1} z + \langle \pi_x, \pi_x \rangle_m - 2z^\top \{\Sigma - V(G, G) \\
&\quad + V(G, W_\lambda G)\}^{-1} V(G, \pi_x) + V(G, \pi_x)^\top \{\Sigma - V(G, G) + V(G, W_\lambda G)\}^{-1} V(G, \pi_x). \quad (\text{B.1})
\end{aligned}$$

It follows from Condition (C3) that  $\{\Sigma - V(G, G)\}^{-1}$  is positive definite and  $V(G, W_\lambda G) \rightarrow 0$ . Let  $c$  denote the minimum eigenvalue of  $\{\Sigma - V(G, G) + V(G, W_\lambda G)\}$ . Then we have  $\{\Sigma - V(G, G) + V(G, W_\lambda G)\}^{-1} \leq c^{-1}\mathbf{1}$  with  $\mathbf{1}$  being the identity matrix. Thus, we have  $z^\top \{\Sigma - V(G, G) + V(G, W_\lambda G)\}^{-1} z \lesssim \|z\|_2^2$ . Direct calculations yield that  $\langle \pi_X, \pi_X \rangle_m \lesssim \|X\|_{L^2}^2 h^{-2a-1}$  and  $V(G, \pi_X) \lesssim \|X\|_{L^2} h^{-a-1/2}$ . Thus, there exists a constant  $c_r > 0$  such that

$$\langle R_W, R_W \rangle_\lambda \leq c_r (\|Z\|_2^2 + \|X\|_{L^2}^2 h^{-2a-1}).$$

Besides, it follows from (B.1) and the proof of Lemma S.4 in Shang and Cheng (2015) that

$$E \langle R_W, R_W \rangle_\lambda \leq c_r h^{-1}.$$

The proof is completed.

To derive the rate of convergence, we still need the following concentration inequality as a preliminary step. Define  $\mathcal{F}_{p_n} = \{\alpha = (\theta^\top, \beta(\cdot)) \in \mathcal{H} : \|\theta\|_2 \leq 1, \|\beta\|_{L^2} \leq 1, J(\beta, \beta) \leq p_n\}$ ,

$$H_n(\alpha) = \frac{1}{\sqrt{n}} \sum_{i=1}^n [\phi_n(Y_i, W_i; \alpha) R_{W_i} - E \phi_n(Y_i, W_i; \alpha) R_{W_i}],$$

where  $\phi_n(Y_i, W_i; \alpha)$  is a function of the observation and parameter, which may depend on  $n$ .

**Lemma B.5** *Suppose that Conditions (C1)–(C4) hold. If  $\phi_n(Y_i, W_i; \mathbf{0}) = 0$  a.s., and there exists a constant  $C_\phi > 0$  such that*

$$|\phi_n(Y_i, W_i; \alpha_1) - \phi_n(Y_i, W_i; \alpha_2)| \leq C_\phi \|\alpha_1 - \alpha_2\|_e, \quad \text{for any } \alpha_1, \alpha_2 \in \mathcal{H},$$

*then we have*

$$\lim_n P \left( \sup_{\alpha \in \mathcal{F}_{p_n}} \frac{\|H_n(\alpha)\|_\lambda}{p_n^{1/(4m)} \|\alpha\|_e^\gamma + n^{-1/2}} \leq \{5h^{-1} \log \log(n)\}^{1/2} \right) = 1,$$

*where  $\gamma = 1 - 1/(2m)$ .*

**Proof of Lemma B.5.** Denote  $N(\delta, \mathcal{F}_{p_n}, \|\cdot\|_2)$  as the  $\delta$ -covering number of the class  $\mathcal{F}_{p_n}$ , in terms of  $\|\cdot\|_2$  norm. Then it follows from Theorem 9.20 of Kosorok et al. (2008) that

$$\begin{aligned} \log N(\delta, \mathcal{F}_{p_n}, \|\cdot\|_2) &\leq N(\delta, p_n^{1/2} \mathcal{F}_1, \|\cdot\|_2) \\ &\leq N(p_n^{-1/2} \delta, \mathcal{F}_1, \|\cdot\|_2) \\ &\lesssim \max\{(p_n^{-1/2} \delta)^{-1/m}, (p_n^{-1/2} \delta)^{-1/p}\}, \end{aligned}$$

where  $p$  is the dimension of  $\theta$ . Thus the conclusion of the lemma directly follows from

$$\exp(-c \max\{(p_n^{-1/2} \delta)^{-1/m}, (p_n^{-1/2} \delta)^{-1/p}\}) \leq \exp\{-c(p_n^{-1/2} \delta)^{-1/m}\}$$

and the proof of Lemma 3.4 in Shang and Cheng (2015).

## C Proofs of Theorems

### C.1 Proof of Theorem 3.1

First, we show that there exists a unique  $\alpha_\lambda$  such that  $\mathcal{S}_\lambda(\alpha_\lambda) = 0$ . Let  $r_{1n} = 2\{J(\beta_0, \beta_0) + 1\}^{1/2} h^k$ , and define the operator:  $T_{1h}(\alpha) = \alpha + \mathcal{S}_\lambda(\alpha_0 + \alpha)$ ,  $\alpha \in \mathcal{H}$ . It is easy to see that

$$\|T_{1h}(\alpha)\|_\lambda = \|\alpha + \mathcal{S}_\lambda(\alpha + \alpha_0)\|_\lambda \leq \|\alpha + \mathcal{S}_\lambda(\alpha + \alpha_0) - \mathcal{S}_\lambda(\alpha_0)\|_\lambda + \|\mathcal{S}_\lambda(\alpha_0)\|_\lambda.$$

Let  $\mathbb{B}(\epsilon) = \{\alpha \in \mathcal{H}, \|\alpha\|_\lambda \leq \epsilon\}$  be the ball of radius  $\epsilon$  in  $\mathcal{H}$ . Note that  $\mathcal{S}(\alpha_0) = 0$ , which implies that  $\mathcal{S}_\lambda(\alpha_0) = -\mathcal{P}_\lambda \alpha_0$ . It follows from the Cauchy-Schwarz inequality that

$$\|\mathcal{S}_\lambda(\alpha_0)\|_\lambda = \|\mathcal{P}_\lambda \alpha_0\|_\lambda \leq \{\lambda J(\beta_0, \beta_0)\}^{1/2} \leq \{J(\beta_0, \beta_0) + 1\}^{1/2} h^k = \frac{r_{1n}}{2}. \quad (\text{C.1})$$

By Lemma B.1, we have

$$\begin{aligned}
\|\alpha + \mathcal{S}_\lambda(\alpha + \alpha_0) - \mathcal{S}_\lambda(\alpha_0)\|_\lambda &= \|\alpha + D\mathcal{S}_\lambda(\alpha_0)\alpha + \int_0^1 \int_0^1 s D^2 \mathcal{S}_\lambda(\alpha_0 + ss'\alpha) \alpha \alpha \, ds \, ds'\|_\lambda \\
&= \|\int_0^1 \int_0^1 s D^2 \mathcal{S}_\lambda(\alpha_0 + ss'\alpha) \alpha \alpha \, ds \, ds'\|_\lambda \\
&\leq \int_0^1 \int_0^1 s \|D^2 \mathcal{S}_\lambda(\alpha_0 + ss'\alpha) \alpha \alpha\|_\lambda \, ds \, ds'. \tag{C.2}
\end{aligned}$$

From the definition of  $D^2 \mathcal{S}_\lambda(\alpha)$ , Lemmas B.2 and B.4, and Condition (C1), we have

$$\|D^2 \mathcal{S}_\lambda(\alpha_0 + ss'\alpha) \alpha \alpha\|_\lambda \lesssim \{E \langle \mathcal{R}_W, \alpha \rangle_\lambda^4\}^{1/2} \{E \|\mathcal{R}_W\|_\lambda^2\}^{1/2} \lesssim \|\alpha\|_\lambda^2 c_r^{1/2} h^{-1/2}. \tag{C.3}$$

From inequalities (C.1)–(C.3), we have

$$\|T_{1h}\|_\lambda \leq c \|\alpha\|_\lambda^2 c_r^{1/2} h^{-1/2} + \frac{r_{1n}}{2}. \tag{C.4}$$

Since  $h = o(1)$  and  $k > a + 1/2 \geq 1/2$ , we have  $r_{1n} h^{-1/2} = o(1)$ . Then for any  $\alpha \in \mathbb{B}(r_{1n})$ ,

$\|T_{1h}\|_\lambda < r_{1n}$  for large enough  $n$ . This implies  $T_{1h}(\mathbb{B}(r_{1h})) \subset \mathbb{B}(r_{1h})$ . Next, we show that  $T_{1h}$

is a contraction mapping. For any  $\alpha_j = (\theta_j^\top, \beta_j(\cdot)) \in \mathcal{H}, j = 1, 2$ , we have

$$\begin{aligned}
T_{1h}(\alpha_1) - T_{1h}(\alpha_2) &= \alpha_1 - \alpha_2 + \mathcal{S}_\lambda(\alpha_0 + \alpha_1) - \mathcal{S}_\lambda(\alpha_0 + \alpha_2) \\
&= \int_0^1 [D\mathcal{S}_\lambda\{\alpha_0 + \alpha_2 + s(\alpha_1 - \alpha_2)\} - D\mathcal{S}_\lambda(\alpha_0)](\alpha_1 - \alpha_2) \, ds \\
&= \int_0^1 \int_0^1 s' D^2 \mathcal{S}_\lambda[\alpha_0 + s'\{\alpha_2 + s(\alpha_1 - \alpha_2)\}](\alpha_1 - \alpha_2) \{\alpha_2 + s(\alpha_1 - \alpha_2)\} \, ds \, ds'.
\end{aligned}$$



By applying the similar arguments used in proving inequality (C.4), we have

$$\begin{aligned}
& \|T_{1h}(\alpha_1) - T_{1h}(\alpha_2)\|_\lambda \\
& \leq \int_0^1 \int_0^1 s' \|D^2 \mathcal{S}_\lambda[\alpha_0 + s'\{\alpha_2 + s(\alpha_1 - \alpha_2)\}](\alpha_1 - \alpha_2)\{\alpha_2 + s(\alpha_1 - \alpha_2)\}\|_\lambda ds ds' \\
& \lesssim \int_0^1 \int_0^1 s' \{E \langle \mathcal{R}_W, \alpha_1 - \alpha_2 \rangle_\lambda^4\}^{1/4} \{E \|\mathcal{R}_W\|_\lambda^2\}^{1/2} \{E \langle \mathcal{R}_W, \alpha_2 + s(\alpha_1 - \alpha_2) \rangle_\lambda^4\}^{1/4} ds ds' \\
& \lesssim \|\alpha_1 - \alpha_2\|_\lambda c_r^{1/2} h^{-1/2} (\|\alpha_1 - \alpha_2\|_\lambda + \|\alpha_2\|_\lambda) \\
& \lesssim r_{1n} \|\alpha_1 - \alpha_2\|_\lambda c_r^{1/2} h^{-1/2} \\
& \leq 1/2 \|\alpha_1 - \alpha_2\|_\lambda.
\end{aligned}$$

The last inequality follows from the fact that  $r_{1n} h^{-1/2} = o(1)$ . Then  $T_{1h}(\alpha)$  is a contraction mapping on  $\mathbb{B}(r_{1n})$ . By the Banach fixed-point theorem, there exists a unique  $\alpha'_\lambda \in \mathbb{B}(r_{1n})$  such that  $T_{1h}(\alpha'_\lambda) = \alpha'_\lambda$ . Define  $\alpha_\lambda = \alpha'_\lambda + \alpha_0$ . Then  $\mathcal{S}_\lambda(\alpha_\lambda) = 0$  and  $\|\alpha_\lambda - \alpha_0\|_\lambda \leq r_{1n}$ .

Second, we show that there exists a unique  $\hat{\alpha}_{n,\lambda}$  such that  $\mathcal{S}_{n,\lambda}(\hat{\alpha}_{n,\lambda}) = 0$ . Since  $\|\alpha_\lambda - \alpha_0\|_\lambda = O(r_{1n}) = o(1)$  and  $D\mathcal{S}_\lambda(\alpha_0) = -id$ , it follows from the Taylor expansion and inequality (C.3) that  $D\mathcal{S}_\lambda(\alpha_\lambda)$  is invertible. By the similar arguments used in Shang and Cheng (2015), we can get that  $\|D\mathcal{S}_\lambda(\alpha_\lambda)\|_\lambda \in (1/2, 3/2)$ . Now define the operator

$$\begin{aligned}
T_{2h}(\alpha) &= \alpha - \{D\mathcal{S}_\lambda(\alpha_\lambda)\}^{-1} \mathcal{S}_{n,\lambda}(\alpha_\lambda + \alpha) \\
&= -\{D\mathcal{S}_\lambda(\alpha_\lambda)\}^{-1} \{D\mathcal{S}_{n,\lambda}(\alpha_\lambda)\alpha - D\mathcal{S}_\lambda(\alpha_\lambda)\alpha\} \\
&\quad - \{D\mathcal{S}_\lambda(\alpha_\lambda)\}^{-1} \{\mathcal{S}_{n,\lambda}(\alpha_\lambda + \alpha) - \mathcal{S}_{n,\lambda}(\alpha_\lambda) - D\mathcal{S}_{n,\lambda}(\alpha_\lambda)\alpha\} - \{D\mathcal{S}_\lambda(\alpha_\lambda)\}^{-1} \mathcal{S}_{n,\lambda}(\alpha_\lambda) \\
&\equiv I_1 + I_2 + I_3.
\end{aligned}$$

It follows from the functional central limit theorem that uniformly in  $t \in \mathbb{I}$

$$\left\| \frac{1}{n} \sum_{j=1}^n \mathcal{Y}_j(t) \exp\{\eta_{\alpha_\lambda}(W_j)\} - s_1^{(0)}(t, \alpha_\lambda) \right\|_\infty = O_p(n^{-1/2}). \quad (\text{C.5})$$

By Lemma B.3 and the functional central limit theorem, we have

$$\begin{aligned} & \left\| \frac{1}{n} \sum_{j=1}^n \mathcal{Y}_j(t) \exp\{\eta_{\alpha_\lambda}(W_j)\} \mathcal{R}_{W_j} - E[\mathcal{Y}_j(t) \exp\{\eta_{\alpha_\lambda}(W_j)\} \mathcal{R}_{W_j}] \right\|_\lambda \\ &= \sup_{\|\alpha_1\|_\lambda=1} \left\langle \frac{1}{n} \sum_{j=1}^n \mathcal{Y}_j(t) \exp\{\eta_{\alpha_\lambda}(W_j)\} \mathcal{R}_{W_j} - E[\mathcal{Y}_j(t) \exp\{\eta_{\alpha_\lambda}(W_j)\} \mathcal{R}_{W_j}], \alpha_1 \right\rangle_\lambda \\ &= O_p(n^{-1/2} h^{-a-1/2}). \end{aligned} \quad (\text{C.6})$$

It follows from  $\mathcal{S}_\lambda(\alpha_\lambda) = 0$ , Lemma B.2, and equations (C.5) and (C.6) that  $E\| [D\mathcal{S}_\lambda(\alpha_\lambda)] I_3 \|^2_\lambda = O((hn)^{-1})$ . This implies that  $\|\mathcal{S}_{n,\lambda}(\alpha_\lambda)\|_\lambda = O_p((nh)^{-1/2})$ . Let  $c$  be a positive constant satisfying  $P(\|\mathcal{S}_{n,\lambda}(\alpha_\lambda)\|_\lambda \leq c(nh)^{-1/2}) \rightarrow 1$ . Define  $r_{2n} = 2c(nh)^{-1/2}$  and  $\mathbb{B}(r_{2n}) = \{\alpha \in \mathcal{H} : \|\alpha\|_\lambda \leq r_{2n}\}$ . Then we have  $P(\|\mathcal{S}_{n,\lambda}(\alpha_\lambda)\|_\lambda \leq r_{2n}/2) \rightarrow 1$ . Define  $\Gamma = \cap_{i=1}^n A_{ni}$ , where

$$A_{ni} = \{\|Z_i\|_2 \leq c \log(n), \|X_i\|_{L^2} \leq c \log(n), \exp\{\eta_{\alpha_\lambda}(W_i)\} \leq c \log(n)\}$$

for a constant  $c$ . From Condition (C4), we can choose  $c$  large enough such that  $P(\Gamma) \rightarrow 1$

and  $P(A_{ni}^c) = O(n^{-1})$ . To handle  $I_1$ , we have

$$\begin{aligned} \|[D\mathcal{S}_\lambda(\alpha_\lambda)] I_1\|_\lambda &\leq \left\| \frac{1}{n} \sum_{i=1}^n \Delta_i \frac{n^{-1} \sum_{j=1}^n \mathcal{Y}_j(Y_i) \exp\{\eta_{\alpha_\lambda}(W_j)\} \eta_\alpha(W_j) \mathcal{R}_{W_j}}{S_0^{(1)}(Y_i, \alpha_\lambda)} \right. \\ &\quad \left. - \int_0^\tau s_1^{(0)}(t, \alpha_0) \frac{E[\mathcal{Y}_j(t) \exp\{\eta_{\alpha_\lambda}(W_j)\} \eta_\alpha(W_j) \mathcal{R}_{W_j}]}{s_1^{(0)}(t, \alpha_\lambda)} h_0(t) dt \right\|_\lambda \\ &+ \left\| \frac{1}{n} \sum_{i=1}^n \Delta_i \frac{\sum_{j=1}^n \mathcal{Y}_j(Y_i) \exp\{\eta_{\alpha_\lambda}(W_j)\} \eta_\alpha(W_j) \sum_{j=1}^n \mathcal{Y}_j(Y_i) \exp\{\eta_{\alpha_\lambda}(W_j)\} \mathcal{R}_{W_j}}{[nS_0^{(1)}(Y_i, \alpha_\lambda)]^2} \right. \\ &\quad \left. - \int_0^\tau s_1^{(0)}(t, \alpha_0) \frac{E[\mathcal{Y}(t) \exp\{\eta_{\alpha_\lambda}(W)\} \eta_\alpha(W)] E[\mathcal{Y}(t) \exp\{\eta_{\alpha_\lambda}(W)\} \mathcal{R}_W]}{[s_1^{(0)}(t, \alpha_\lambda)]^2} h_0(t) dt \right\|_\lambda \\ &\equiv I_{11} + I_{12}. \end{aligned} \quad (\text{C.7})$$

For  $I_{11}$ , we have

$$\begin{aligned}
\|I_{11}\|_\lambda &\leq \left\| \frac{1}{n} \sum_{i=1}^n \int_0^\tau \frac{n^{-1} \sum_{j=1}^n \mathcal{Y}_j(t) \exp\{\eta_{\alpha_\lambda}(W_j)\} \eta_\alpha(W_j) \mathcal{R}_{W_j}}{s_1^{(0)}(t, \alpha_\lambda)} \right. \\
&\quad \left. - \frac{E[\mathcal{Y}_j(t) \exp\{\eta_{\alpha_\lambda}(W_j)\} \eta_\alpha(W_j) \mathcal{R}_{W_j}]}{s_1^{(0)}(t, \alpha_\lambda)} dN_i(t) \right\|_\lambda \\
&\quad + \frac{1}{n} \left\| \sum_{i=1}^n \int_0^\tau n^{-1} \sum_{j=1}^n \mathcal{Y}_j(t) \exp\{\eta_{\alpha_\lambda}(W_j)\} \eta_\alpha(W_j) \mathcal{R}_{W_j} \left\{ \frac{1}{s_1^{(0)}(t, \alpha_\lambda)} - \frac{1}{S_1^{(0)}(t, \alpha_\lambda)} \right\} dN_i(t) \right\|_\lambda \\
&\quad + \left\| \frac{1}{n} \sum_{i=1}^n \int_0^\tau \frac{E\mathcal{Y}_j(t) \exp\{\eta_{\alpha_\lambda}(W_j)\} \eta_\alpha(W_j) \mathcal{R}_{W_j}}{s_1^{(0)}(t, \alpha_\lambda)} dN_i(t) \right. \\
&\quad \left. - \int_0^\tau s_1^{(0)}(t, \alpha_0) \frac{E\mathcal{Y}_j(t) \exp\{\eta_{\alpha_\lambda}(W_j)\} \eta_\alpha(W_j) \mathcal{R}_{W_j}}{s_1^{(0)}(t, \alpha_\lambda)} h_0(t) dt \right\|_\lambda \\
&\equiv I_{111} + I_{112} + I_{113}.
\end{aligned}$$

For  $I_{113}$ , we have

$$\begin{aligned}
I_{113} &= \left\| \int_0^\tau \frac{E\mathcal{Y}_j(t) \exp\{\eta_{\alpha_\lambda}(W_j)\} \eta_\alpha(W_j) \mathcal{R}_{W_j}}{s_1^{(0)}(t, \alpha_\lambda)} \frac{1}{n} \sum_{i=1}^n \{dN_i(t) - E dN_i(t)\} \right\|_\lambda \\
&= O_p((nh)^{-1/2}) \|\alpha\|_\lambda.
\end{aligned}$$

To infer  $I_{111}$ , define

$$\phi(Y_j, W_j; \alpha) = \frac{\mathcal{Y}_j(t_0) \exp\{\eta_{\alpha_\lambda}(W_j)\} \eta_\alpha(W_j)}{s_1^{(0)}(t_0, \alpha_\lambda)} I_{A_{nj}}.$$

Then for any  $\alpha_1, \alpha_2 \in \mathcal{H}$ , we have

$$\begin{aligned}
|\phi(Y_j, W_j; \alpha_1) - \phi(Y_j, W_j; \alpha_2)| &= \frac{1}{s_1^{(0)}(t_0, \alpha_\lambda)} \mathcal{Y}_j(t_0) \exp\{\eta_{\alpha_\lambda}(W_j)\} |\{\eta_{\alpha_1}(W_j) - \eta_{\alpha_2}(W_j)\}| I_{A_{nj}} \\
&\leq \frac{c \log(n)}{s_1^{(0)}(t_0, \alpha_\lambda)} |\langle \mathcal{R}_{W_j}, \alpha_1 - \alpha_2 \rangle_\lambda| I_{A_{nj}} \\
&\leq \frac{\{c \log(n)\}^2}{s_1^{(0)}(t_0, \alpha_\lambda)} \|\alpha_1 - \alpha_2\|_e.
\end{aligned}$$

Define  $\phi_n(Y_j, W_j; \alpha) = s_1^{(0)}(t_0, \alpha_\lambda) c^{-2} \{\log(n)\}^{-2} \phi(Y_j, W_j; \alpha_1)$ . Then

$$|\phi_n(Y_j, W_j; \alpha_1) - \phi_n(Y_j, W_j; \alpha_2)| \leq \|\alpha_1 - \alpha_2\|_e.$$

For any  $\alpha \neq 0 \in \mathcal{H}$ , let  $\tilde{\alpha} = \alpha / (d_n \|\alpha\|_\lambda)$ , where  $d_n = \kappa h^{-(2a+1)/2}$ . It follows from Lemma B.3 that  $\|\tilde{\alpha}\|_e \leq d_n \|\tilde{\alpha}\|_\lambda = 1$ . Then we have  $\|\tilde{\theta}\|_2 + \|\tilde{\beta}\|_{L_2} \leq 1$ . Meanwhile, we have  $\lambda J(\tilde{\beta}, \tilde{\beta}) \leq \|\tilde{\alpha}\|_\lambda^2 = d_n^{-2}$ . Then  $J(\tilde{\beta}, \tilde{\beta}) \leq \lambda^{-1} d_n^{-2} \equiv p_n$ . By Lemma B.5, we obtain that for any  $\alpha \in \mathbb{B}(r_{2n})$ ,

$$\begin{aligned} \lim_n P \left( \left\| \sum_{j=1}^n [\phi_n(Y_j, W_j; \tilde{\alpha}) \mathcal{R}_{W_j} - E\{\phi_n(Y_j, W_j; \tilde{\alpha}) \mathcal{R}_{W_j}\}] \right\|_\lambda \right) \\ \lesssim (n^{1/2} p_n^{1/(4m)} + 1) \{h^{-1} \log \log(n)\}^{1/2} = 1. \end{aligned}$$

Therefore, we have

$$\begin{aligned} \lim_n P \left( \left\| \sum_{j=1}^n [\phi(Y_j, W_j; \alpha) \mathcal{R}_{W_j} - E\{\phi(Y_j, W_j; \alpha) \mathcal{R}_{W_j}\}] \right\|_\lambda \right) \\ \lesssim d_n \{\log(n)\}^2 \|\alpha\|_\lambda (n^{1/2} p_n^{1/(4m)} + 1) \{h^{-1} \log \log(n)\}^{1/2} = 1. \end{aligned}$$

It follows from the definition of  $A_{ni}$  that

$$\begin{aligned} \left\| \frac{E[\mathcal{Y}_j(t_0) \exp\{\eta_{\alpha_\lambda}(W_j)\} \eta_\alpha(W_j) \mathcal{R}_{W_j} I_{A_{nj}^c}]}{s_1^{(0)}(t, \alpha_\lambda)} \right\|_\lambda &\leq E \left\| \langle \mathcal{R}_{W_j}, \alpha \rangle_\lambda \mathcal{R}_{W_j} I_{A_{nj}^c} \right\|_\lambda \\ &= O(P(A_{ni}^c)^{1/2} h^{-1/2}) \|\alpha\|_\lambda = o(1) \|\alpha\|_\lambda. \end{aligned}$$

Thus, we have

$$I_{111} = O_p(n^{-1/2} h^{-(a+1) - \frac{2k-2a-1}{4m}} \{\log(n)\}^2 \{\log \log(n)\}^{1/2}) \|\alpha\|_\lambda + o_p(1) \|\alpha\|_\lambda = o_p(1) \|\alpha\|_\lambda.$$

From Lemma B.4, we can get that

$$\frac{1}{n} \left\| \sum_{i=1}^n \int_0^\tau E \left[ \frac{1}{n} \sum_{j=1}^n \mathcal{Y}_j(t) \exp\{\eta_{\alpha_\lambda}(W_j)\} \eta_\alpha(W_j) \mathcal{R}_{W_j} \right] dN_i(t) \right\|_\lambda = O_p(h^{-1/2} \|\alpha\|_\lambda).$$

Then by equation (C.5) and  $(nh)^{-1} = o(1)$ , we have  $I_{112} = o_p(1)\|\alpha\|_\lambda$ .

Similar to  $I_{11}$ , we can get that  $I_{12} = o_p(1)\|\alpha\|_\lambda$ . Therefore, for any  $\alpha \in \mathbb{B}(r_{2n})$ ,  $\|[D\mathcal{S}_\lambda(\alpha_\lambda)]I_1\| \leq r_{2n}/18$ . For  $\|[D\mathcal{S}_\lambda(\alpha_\lambda)]I_2\|_\lambda$ , we have

$$\begin{aligned} \|[D\mathcal{S}_\lambda(\alpha_\lambda)]I_2\|_\lambda &= \|\{\mathcal{S}_{n,\lambda}(\alpha_\lambda + \alpha) - \mathcal{S}_{n,\lambda}(\alpha_\lambda) - D\mathcal{S}_{n,\lambda}(\alpha_\lambda)\alpha\}\|_\lambda \\ &= \left\| \int_0^1 \int_0^1 s D^2 \mathcal{S}_{n,\lambda}(\alpha_\lambda + ss'\alpha) \alpha \alpha \, ds \, ds' \right\|_\lambda. \end{aligned}$$

It follows from inequality (C.3) that

$$\begin{aligned} &\|D^2 \mathcal{S}_{n,\lambda}(\alpha_\lambda + ss'\alpha) \alpha \alpha\|_\lambda \\ &\leq \|D^2 \mathcal{S}_{n,\lambda}(\alpha_\lambda + ss'\alpha) \alpha \alpha - D^2 \mathcal{S}_\lambda(\alpha_\lambda + ss'\alpha) \alpha \alpha\|_\lambda + \|D^2 \mathcal{S}_\lambda(\alpha_\lambda + ss'\alpha) \alpha \alpha\|_\lambda \\ &= \|D^2 \mathcal{S}_{n,\lambda}(\alpha_\lambda + ss'\alpha) \alpha \alpha - D^2 \mathcal{S}_\lambda(\alpha_\lambda + ss'\alpha) \alpha \alpha\|_\lambda + O(h^{-1/2})\|\alpha\|_\lambda^2. \end{aligned}$$

By using the similar arguments applied to  $I_{111}$ , we can get that

$$\begin{aligned} &\|D^2 \mathcal{S}_{n,\lambda}(\alpha_\lambda + ss'\alpha) \alpha \alpha - D^2 \mathcal{S}_\lambda(\alpha_\lambda + ss'\alpha) \alpha \alpha\|_\lambda \\ &= O_p\left(n^{-1}h^{-(2a+1)-\frac{2k-2a-1}{4m}} \log(n)^3 \{\log \log(n)\}^{1/2} \{1 + n^{-1/2}\}\right) \|\alpha\|_\lambda \\ &\quad + O_p\left(\frac{1}{h^{1/2}} + \frac{1}{\sqrt{nh}^{(a+1)+\frac{2k-2a-1}{4m}}} \{\log(n)\}^2 \{\log \log(n)\}^{1/2} h^{-1/2} (1 + \{nh^2\}^{-1/2})\right. \\ &\quad \left.+ n^{-1/2} \log(n) h^{-(2a+1)/2} + n^{-1/2} h^{-(a+1)-\frac{2k-2a-1}{4m}} \{\log(n)\}^2 \{\log \log(n)\}^{1/2} + n^{-1/2} h^{-1}\right) \|\alpha\|_\lambda^2. \end{aligned}$$

It follows from  $\alpha \in \mathbb{B}(r_{2n})$  and the conditions in the theorem that

$$\|D^2 \mathcal{S}_{n,\lambda}(\alpha_\lambda + ss'\alpha) \alpha \alpha - D^2 \mathcal{S}_\lambda(\alpha_\lambda + ss'\alpha) \alpha \alpha\|_\lambda = o_p(1)\|\alpha\|_\lambda.$$

Then we have  $\|[D\mathcal{S}_\lambda(\alpha_\lambda)]I_2\|_\lambda \leq 11\|\alpha\|_\lambda/18$ . Therefore, for any  $\alpha \in \mathbb{B}(r_{2n})$ ,

$$\|T_{2h}(\alpha)\|_\lambda \leq \|I_1\|_\lambda + \|I_2\|_\lambda + \|I_3\|_\lambda \leq 11r_{2n}/12.$$

That is,  $T_{2h}(\mathbb{B}(r_{2n})) \subset \mathbb{B}(r_{2n})$ . Using the same arguments as the above, we can get that  $T_{2h}$  is a contraction mapping in  $\mathbb{B}(r_{2n})$ . Therefore, there exists a unique  $\alpha' \in \mathbb{B}(r_{2n})$  such that  $T_{2h}(\alpha') = \alpha'$ , implying  $\mathcal{S}_{n,\lambda}(\alpha_\lambda + \alpha') = 0$ . Let  $\hat{\alpha}_{n,\lambda} = \alpha_\lambda + \alpha'$ . Then  $\mathcal{S}_{n,\lambda}(\hat{\alpha}_{n,\lambda}) = 0$ . Therefore, with probability approaching to 1, we have

$$\|\hat{\alpha}_{n,\lambda} - \alpha_0\|_\lambda \leq r_{1n} + r_{2n} = O_P((nh)^{-1/2} + h^k).$$

## C.2 Proof of Theorem 3.2

It follows from Theorem 3.1 that there exists a constant  $M > 0$  such that, with probability approaching to one,  $\|\hat{\alpha}_{n,\lambda} - \alpha_0\|_\lambda \leq Mr_n$ . For simplicity, denote  $\alpha = \hat{\alpha}_{n,\lambda} - \alpha_0$ . We can assume that  $\|\alpha\|_\lambda \leq Mr_n$  since its complement is negligible in terms of probability. Let  $d_n = \kappa M h^{-(2a+1)/2} r_n$ ,  $\tilde{\alpha} = d_n^{-1} \alpha$ , and  $p_n = \kappa^{-2} h^{1-2k}$ , where  $\kappa$  is a constant given in Lemma B.3. Clearly,  $p_n \geq 1$  when  $n$  is large enough since  $h \rightarrow 0$  with  $n \rightarrow \infty$  and  $1 - 2k < 0$ . It can be shown that  $\|\alpha\|_\lambda \leq Mr_n$  implies  $\tilde{\alpha} \in \mathcal{F}_{p_n}$ . To see this, write  $\tilde{\alpha} = (\tilde{\theta}^\top, \tilde{\beta}(\cdot))$ . Then  $\|\tilde{\alpha}\|_e = d_n^{-1} \|\alpha\|_e \leq d_n^{-1} \kappa h^{-(2a+1)/2} \|\alpha\|_\lambda \leq d_n^{-1} \kappa h^{-(2a+1)/2} Mr_n = 1$ . Thus, we can get

$$J(\tilde{\beta}, \tilde{\beta}) = d_n^{-2} \lambda^{-1} \{\lambda J(\beta, \beta)\} \leq d_n^{-2} \lambda^{-1} \|\alpha\|_\lambda^2 \leq d_n^{-2} \lambda^{-1} (Mr_n)^2 = \kappa^{-2} h^{1-2k} = p_n.$$

Besides, we have

$$\begin{aligned} & \|\mathcal{S}_{n,\lambda}(\alpha + \alpha_0) - \mathcal{S}_{n,\lambda}(\alpha_0) - \{\mathcal{S}_\lambda(\alpha + \alpha_0) - \mathcal{S}_\lambda(\alpha_0)\}\|_\lambda \\ &= \|\mathcal{S}_n(\alpha + \alpha_0) - \mathcal{S}_n(\alpha_0) - \{\mathcal{S}(\alpha + \alpha_0) - \mathcal{S}(\alpha_0)\}\|_\lambda. \end{aligned} \tag{C.8}$$

For the right hand side of equation (C.8), we have

$$\begin{aligned}
& \|\mathcal{S}_n(\alpha + \alpha_0) - \mathcal{S}_n(\alpha_0) - \{\mathcal{S}(\alpha + \alpha_0) - \mathcal{S}(\alpha_0)\}\|_\lambda \\
&= \left\| \frac{1}{n} \sum_{i=1}^n \Delta_i \left[ \mathcal{R}_{W_i} - \frac{n^{-1} \sum_j \mathcal{Y}_j(Y_i) \exp\{\eta_{\alpha+\alpha_0}(W_j)\} \mathcal{R}_{W_j}}{S_1^{(0)}(Y_i, \alpha + \alpha_0)} \right] \right. \\
&\quad \left. - \frac{1}{n} \sum_{i=1}^n \Delta_i \left[ \mathcal{R}_{W_i} - \frac{n^{-1} \sum_j \mathcal{Y}_j(Y_i) \exp\{\eta_{\alpha_0}(W_j)\} \mathcal{R}_{W_j}}{S_1^{(0)}(Y_i, \alpha_0)} \right] - \{\mathcal{S}(\alpha + \alpha_0) - \mathcal{S}(\alpha_0)\} \right\|_\lambda \\
&\leq \left\| \frac{1}{n} \sum_{i=1}^n \int_0^\tau \left[ \left\{ \frac{\sum_j \mathcal{Y}_j(t) \exp\{\eta_{\alpha+\alpha_0}(W_j)\} \mathcal{R}_{W_j}}{n S_1^{(0)}(t, \alpha_0 + \alpha)} - \frac{\sum_j \mathcal{Y}_j(t) \exp\{\eta_{\alpha_0}(W_j)\} \mathcal{R}_{W_j}}{n S_1^{(0)}(t, \alpha_0)} \right\} \right. \right. \\
&\quad \left. \left. + \left\{ \frac{E\mathcal{Y}(t) \exp\{\eta_{\alpha+\alpha_0}(W)\} \mathcal{R}_W}{s_1^{(0)}(t, \alpha_0 + \alpha)} - \frac{E\mathcal{Y}(t) \exp\{\eta_{\alpha_0}(W)\} \mathcal{R}_W}{s_1^{(0)}(t, \alpha_0)} \right\} \right] dN_i(t) \right\|_\lambda + (nh)^{-1/2} \\
&\leq \left\| \frac{1}{n} \sum_{i=1}^n \int_0^\tau \left[ \left\{ \frac{\sum_j \mathcal{Y}_j(Y_i) \exp\{\eta_{\alpha+\alpha_0}(W_j)\} \mathcal{R}_{W_j}}{n s_1^{(0)}(t, \alpha_0 + \alpha)} - \frac{\sum_j \mathcal{Y}_j(t) \exp\{\eta_{\alpha_0}(W_j)\} \mathcal{R}_{W_j}}{n s_1^{(0)}(t, \alpha_0)} \right\} \right. \right. \\
&\quad \left. \left. + \left\{ \frac{E\mathcal{Y}(t) \exp\{\eta_{\alpha+\alpha_0}(W)\} \mathcal{R}_W}{s_1^{(0)}(t, \alpha_0 + \alpha)} - \frac{E\mathcal{Y}(t) \exp\{\eta_{\alpha_0}(W)\} \mathcal{R}_W}{s_1^{(0)}(t, \alpha_0)} \right\} \right] dN_i(t) \right\|_\lambda \\
&\quad + O_p \left( \frac{1}{(nh)^{1/2}} + \frac{1}{h^{1/2+a} n^{1/2}} \right).
\end{aligned}$$

Define  $\Gamma = \cap_{i=1}^n A_{ni}$ , where

$$A_{ni} = \{\|Z_i\|_2 \leq c \log(n), \|X_i\|_{L^2} \leq c \log(n), \exp\{\eta_{\alpha_\lambda}(W_i)\} \leq c \log(n)\}.$$

For any  $t_0$ , define  $\varphi(Y_j; \alpha) = [\mathcal{Y}_j(t_0) \exp\{\eta_{\alpha+\alpha_0}(W_j)\} - \mathcal{Y}_j(t_0) \exp\{\eta_{\alpha_0}(W_j)\}]$ ,  $D_n = \{c \log(n)\}^2 d_n^{-1}$ ,

and  $\varphi_n(Y_j; \tilde{\alpha}) = D_n \varphi(Y_j; d_n \tilde{\alpha}) \mathbf{1}_{A_{ni}}$ . Then  $|\varphi_n(Y_j; \tilde{\alpha}_1) - \varphi_n(Y_j; \tilde{\alpha}_2)| \leq \|\tilde{\alpha}_1 - \tilde{\alpha}_2\|_e$ . Since

$\|\alpha\|_\lambda \leq M r_n$ ,  $\tilde{\alpha} \in \mathcal{F}_{p_n}$ , it follows from Lemma B.5 that with probability approaching to one,

$$\begin{aligned}
& n^{-1/2} \left\| \sum_{j=1}^n \varphi_n(Y_j; \tilde{\alpha}) \mathcal{R}_{W_j} - E \varphi_n(Y_j; \tilde{\alpha}) \mathcal{R}_{W_j} \right\|_\lambda \lesssim (p_n^{1/(4m)} \|\tilde{\alpha}\|_e^\gamma + n^{-1/2}) \{h^{-1} \log \log(n)\}^{1/2} \\
& \lesssim (p_n^{1/(4m)} + n^{-1/2}) \{h^{-1} \log \log(n)\}^{1/2},
\end{aligned}$$

where  $\gamma = 1 - 1/(2m)$ . On the other hand, by the Taylor expansion, the Cauchy-Schwarz inequality, Lemma B.2 and Theorem 3.1, we have

$$\begin{aligned}
& \|E\{\varphi(Y_j; d_n \tilde{\alpha}) \mathcal{R}_{W_j} I_{A_{n_j}}^c\}\|_\lambda \leq \{E|\varphi(Y_j; d_n \tilde{\alpha}) I_{A_{n_j}}^c|^2\}^{1/2} \{E\|\mathcal{R}_{W_j}\|_\lambda^2\}^{1/2} \\
& \lesssim (E[\mathcal{Y}_j(t_0) \exp\{\eta_{\alpha_0}(W_j)\} \langle \mathcal{R}_{W_j}, \tilde{\alpha} \rangle_\lambda]^2)^{1/2} c_r^{1/2} h^{-1/2} \\
& \lesssim (E[\mathcal{Y}_j(t_0) \exp\{\eta_{\alpha_0}(W_j)\}]^4)^{1/4} P(A_{n_j}^c)^{1/4} [E\{(\|Z\|_2 + \|X_j\|_{L_2})^4\}]^{1/4} c_r h^{-1/2}.
\end{aligned}$$

From Condition (C4), we can choose  $c$  large enough such that

$$n^{1/2} h^{-1/2} P(A_{n_i}^c)^{1/4} = o(p_n^{1/(4m)} \{h^{-1} \log \log(n)\}^{1/2}).$$

Then

$$n^{1/2} \|E\{\varphi(Y_j; d_n \tilde{\alpha}) \mathcal{R}_{W_j} I_{A_{n_j}}^c\}\|_\lambda \lesssim p_n^{1/(4m)} \{h^{-1} \log \log(n)\}^{1/2}.$$

Thus, on  $\Gamma_n$ , as  $n \rightarrow \infty$ , we have

$$n^{-1/2} D_n \|\mathcal{S}_n(\alpha + \alpha_0) - \mathcal{S}_n(\alpha_0) - \{\mathcal{S}(\alpha + \alpha_0) - \mathcal{S}(\alpha_0)\}\|_\lambda \lesssim p_n^{1/(4m)} \{h^{-1} \log \log(n)\}^{1/2}. \quad (\text{C.9})$$

For the left hand side of equation (C.8), we have

$$\begin{aligned}
& \|\mathcal{S}_{n,\lambda}(\alpha + \alpha_0) - \mathcal{S}_{n,\lambda}(\alpha_0) - \{\mathcal{S}_\lambda(\alpha + \alpha_0) - \mathcal{S}_\lambda(\alpha_0)\}\|_\lambda \\
& = \left\| -\mathcal{S}_{n,\lambda}(\alpha_0) - D\mathcal{S}_\lambda(\alpha_0)\alpha - \int_0^1 \int_0^1 s D^2 \mathcal{S}_\lambda(\alpha_0 + ss'\alpha) \alpha \alpha ds ds' \right\|_\lambda \\
& = \left\| \alpha - \mathcal{S}_{n,\lambda}(\alpha_0) - \int_0^1 \int_0^1 s D^2 \mathcal{S}_\lambda(\alpha_0 + ss'\alpha) \alpha \alpha ds ds' \right\|_\lambda \\
& \geq \left\| \alpha - \mathcal{S}_{n,\lambda}(\alpha_0) \right\|_\lambda - \left\| \int_0^1 \int_0^1 s D^2 \mathcal{S}_\lambda(\alpha_0 + ss'\alpha) \alpha \alpha ds ds' \right\|_\lambda. \quad (\text{C.10})
\end{aligned}$$



It follows from inequality (B.3) that

$$\begin{aligned} \left\| \int_0^1 \int_0^1 s D^2 \mathcal{S}_\lambda(\alpha_0 + ss' \alpha) \alpha \alpha \, ds \, ds' \right\|_\lambda &\leq \int_0^1 \int_0^1 s \|D^2 \mathcal{S}_\lambda(\alpha_0 + ss' \alpha) \alpha \alpha\|_\lambda \, ds \, ds' \\ &\lesssim \|\alpha\|_\lambda^2 c_r^{1/2} h^{-1/2} \lesssim h^{-1/2} r_n^2. \end{aligned} \quad (\text{C.11})$$

Therefore, it follows from (C.8)–(C.11) that

$$\|\alpha - \mathcal{S}_{n,\lambda}(\alpha_0)\|_\lambda \leq O_p(a_n).$$

The proof of Theorem 3.2 is completed.

### C.3 Proof of Theorem 3.3

Define  $\hat{\alpha}_{n,\lambda}^h = (\hat{\theta}_{n,\lambda}, h^{a+1/2} \hat{\beta}_{n,\lambda})$ ,  $\alpha_0^* = (id - \mathcal{P}_\lambda) \alpha_0$ ,  $\alpha_0^{*h} = (\theta_0^*, h^{a+1/2} \beta_0^*)$ ,  $\tilde{\mathcal{R}}_u^h = (\tilde{H}_u, h^{a+1/2} \tilde{T}_u)$ ,

and

$$Rem_n = \hat{\alpha}_{n,\lambda} - \alpha_0^* - \frac{1}{n} \sum_{i=1}^n \int_0^\tau \left[ \mathcal{R}_{W_i} - \frac{n^{-1} \sum_{j=1}^n \mathcal{Y}_j(t) \exp\{\eta_{\alpha_0}(W_j)\} \mathcal{R}_{W_j}}{n^{-1} \sum_{j=1}^n \mathcal{Y}_j(t) \exp\{\eta_{\alpha_0}(W_j)\}} \right] dN_i(t).$$

It follows from Theorem 3.2 that  $\|Rem_n\|_\lambda = O_p(a_n)$ . Thus, we have

$$\|\hat{\theta}_{n,\lambda} - \theta_0^* - \frac{1}{n} \sum_{i=1}^n \int_0^\tau \left[ \mathcal{H}_{W_i} - \frac{n^{-1} \sum_{j=1}^n \mathcal{Y}_j(t) \exp\{\eta_{\alpha_0}(W_j)\} \mathcal{H}_{W_j}}{n^{-1} \sum_{j=1}^n \mathcal{Y}_j(t) \exp\{\eta_{\alpha_0}(W_j)\}} \right] dN_i(t)\|_2 = O_p(a_n).$$

Define

$$Rem_n^h = \hat{\alpha}_{n,\lambda}^h - \alpha_0^{*h} - \frac{1}{n} \sum_{i=1}^n \int_0^\tau \left[ \mathcal{R}_{W_i}^h - \frac{n^{-1} \sum_{j=1}^n \mathcal{Y}_j(t) \exp\{\eta_{\alpha_0}(W_j)\} \mathcal{R}_{W_j}^h}{n^{-1} \sum_{j=1}^n \mathcal{Y}_j(t) \exp\{\eta_{\alpha_0}(W_j)\}} \right] dN_i(t).$$

Then it is easy to show that  $\|Rem_n^h - h^{a+1/2} Rem_n\|_\lambda = O_p(a_n)$ . It follows from  $a_n = o(n^{-1/2})$

that

$$\|Rem_n^h\|_\lambda \leq \|Rem_n^h - h^{a+1/2} Rem_n\|_\lambda + h^{a+1/2} \|Rem_n\|_\lambda = o_p(n^{-1/2}).$$

Next, we will use  $Rem_n^h$  to obtain the joint limiting distribution. The idea is to employ the Cramér-Wold device. For any  $u = (z^\top, t) \in \mathbb{R}^p \times \mathbb{I}$ , we will obtain the limiting distribution of  $n^{1/2}z^\top(\hat{\theta}_{n,\lambda} - \theta_0^*) + n^{1/2}h^{a+1/2}\{\hat{\beta}_{n,\lambda}(t) - \beta_0^*(t)\}$ . Note that this is equivalent to getting the asymptotic results about  $n^{1/2}\left\langle \tilde{\mathcal{R}}_u, \hat{\alpha}_{n,\lambda}^h - \alpha_0^{*h} \right\rangle_\lambda$ . It follows from Theorem 3.2 that  $n^{1/2}|\left\langle \tilde{\mathcal{R}}_u, Rem_n^h \right\rangle_\lambda| = O_p(n^{1/2}h^{-(a+1/2)}a_n)$ . Thus, we only need to get the limiting distribution of

$$n^{1/2} \left\langle \tilde{\mathcal{R}}_u, \frac{1}{n} \sum_{i=1}^n \int_0^\tau \left[ \mathcal{R}_{W_i}^h - \frac{n^{-1} \sum_{j=1}^n \mathcal{Y}_j(t) \exp\{\eta_{\alpha_0}(W_j)\} \mathcal{R}_{W_j}^h}{n^{-1} \sum_{j=1}^n \mathcal{Y}_j(t) \exp\{\eta_{\alpha_0}(W_j)\}} \right] dN_i(t) \right\rangle_\lambda.$$

Direct calculations yield that

$$\begin{aligned} & n^{1/2} \left\langle \tilde{\mathcal{R}}_u, \frac{1}{n} \sum_{i=1}^n \int_0^\tau \left[ \mathcal{R}_{W_i}^h - \frac{n^{-1} \sum_{j=1}^n \mathcal{Y}_j(s) \exp\{\eta_{\alpha_0}(W_j)\} \mathcal{R}_{W_j}^h}{n^{-1} \sum_{j=1}^n \mathcal{Y}_j(s) \exp\{\eta_{\alpha_0}(W_j)\}} \right] dN_i(s) \right\rangle_\lambda \\ &= n^{-1/2} \sum_{i=1}^n \int_0^\tau \left[ z^\top H_{W_i} + h^{a+1/2} T_{W_i}(t) \right. \\ & \quad \left. - \frac{\sum_{j=1}^n \mathcal{Y}_j(s) \exp\{\eta_{\alpha_0}(W_j)\} \{z^\top H_{W_j} + h^{a+1/2} T_{W_j}(t)\}}{\sum_{j=1}^n \mathcal{Y}_j(s) \exp\{\eta_{\alpha_0}(W_j)\}} \right] dM_i(s) \\ & \equiv \mathcal{U}_n. \end{aligned}$$

Define  $\mathcal{K}_i(u) \equiv z^\top H_{W_i} + h^{a+1/2} T_{W_i}(t)$ . Therefore, we have

$$\begin{aligned} \mathcal{U}_n &= n^{-1/2} \sum_{i=1}^n \int_0^\tau \left\{ \mathcal{K}_i(u) - \frac{E\mathcal{Y}_j(s) \exp\{\eta_{\alpha_0}(W_j)\} [\mathcal{K}_j(u)]}{E\mathcal{Y}_j(s) \exp\{\eta_{\alpha_0}(W_j)\}} \right\} dM_i(s) + O_p(n^{-1/2}h^{-a-1/2}) \\ &\equiv n^{-1/2} \sum_{i=1}^n \mathcal{U}_i + o_p(1). \end{aligned}$$

Direct calculations yield that

$$\begin{aligned}
Var(\mathcal{U}_i) &= E \int_0^\tau \left[ \mathcal{K}_i(u) - \frac{E\mathcal{Y}_j(s) \exp\{\eta_{\alpha_0}(W_j)\} \mathcal{K}_j(u)}{E\mathcal{Y}_j(s) \exp\{\eta_{\alpha_0}(W_j)\}} \right]^2 dN_i(s) \\
&= h^{2a+1} E \int_0^\tau \left[ \pi_{X_i}(t) - \frac{E\mathcal{Y}_j(s) \exp\{\eta_{\alpha_0}(W_j)\} \pi_{X_j}(t)}{E\mathcal{Y}_j(s) \exp\{\eta_{\alpha_0}(W_j)\}} \right]^2 dN_i(s) \\
&\quad + 2h^{a+1/2} (z - h^{a+1/2} \omega(t))^\top \{\Sigma - V(G, G) + V(G, W_\lambda G)\}^{-1} \\
&\quad \times E \int_0^\tau \left[ \pi_{X_i}(t) - \frac{E\mathcal{Y}_j(s) \exp\{\eta_{\alpha_0}(W_j)\} \pi_{X_j}(t)}{E\mathcal{Y}_j(s) \exp\{\eta_{\alpha_0}(W_j)\}} \right] \\
&\quad \times \left[ \{Z_i - V(G, \pi_{X_i})\} - \frac{E\mathcal{Y}_j(s) \exp\{\eta_{\alpha_0}(W_j)\} \{Z_j - V(G, \pi_{X_j})\}}{E\mathcal{Y}_j(s) \exp\{\eta_{\alpha_0}(W_j)\}} \right] dN_i(s) \\
&\quad + (z - h^{a+1/2} \omega(t))^\top \{\Sigma - V(G, G) + V(G, W_\lambda G)\}^{-1} \\
&\quad \times E \int_0^\tau \left[ \{Z_i - V(G, \pi_{X_i})\} - \frac{E\mathcal{Y}_j(s) \exp\{\eta_{\alpha_0}(W_j)\} \{Z_j - V(G, \pi_{X_j})\}}{E\mathcal{Y}_j(s) \exp\{\eta_{\alpha_0}(W_j)\}} \right]^{\otimes 2} dN_i(s) \\
&\quad \times \{\Sigma - V(G, G) + V(G, W_\lambda G)\}^{-1} (z - h^{a+1/2} \omega(t)),
\end{aligned}$$

and

$$\begin{aligned}
&E \int_0^\tau \left[ \{Z_i - V(G, \pi_{X_i})\} - \frac{E\mathcal{Y}_j(s) \exp\{\eta_{\alpha_0}(W_j)\} \{Z_j - V(G, \pi_{X_j})\}}{E\mathcal{Y}_j(s) \exp\{\eta_{\alpha_0}(W_j)\}} \right] \\
&\quad \times \left\{ \pi_{X_i}(t) - \frac{E\mathcal{Y}_j(s) \exp\{\eta_{\alpha_0}(W_j)\} \pi_{X_j}(t)}{E\mathcal{Y}_j(s) \exp\{\eta_{\alpha_0}(W_j)\}} \right\} dN_i(s) \\
&= \sum_{j=1}^{\infty} \left\{ \frac{G_j}{1 + \lambda \rho_j} h_j(t) - \frac{G_j}{(1 + \lambda \rho_j)^2} h_j(t) \right\} \\
&= \sum_{j=1}^{\infty} \frac{\lambda \rho_j G_j}{(1 + \lambda \rho_j)^2} h_j(t) = W_\lambda \omega(t).
\end{aligned}$$

Using the arguments similar to the proof of Theorem 3.1 in Cheng and Shang (2015), we have  $h^{a+1/2} \rightarrow 0$ ,  $\omega(t) = O(1)$ ,  $h^{a+1/2} W_\lambda \omega(t) \rightarrow 0$ ,  $\sqrt{n} \{\theta_0^* - \theta_0\} \rightarrow 0$ , and  $\sqrt{n} h^{a+1/2} \{\beta_0^*(t) -$

$\beta_0(t) + \{W_\lambda(\beta_0)\}(t) \rightarrow 0$ . Then, as  $\lambda \rightarrow 0$ , we have

$$\begin{aligned} \text{Var}(\mathcal{U}_i) &\rightarrow \sigma_t^2 + 2(z + \gamma_0)^\top \{\Sigma - V(G, G)\}^{-1} \xi_0 + (z + \gamma_0)^\top \{\Sigma - V(G, G)\}^{-1} (z + \gamma_0) \\ &\equiv (z^\top, 1) \Phi (z^\top, 1)^\top. \end{aligned}$$

It follows from the Lindeberg's central limit theorem that

$$\begin{bmatrix} \sqrt{n}(\hat{\theta}_{n,\lambda} - \theta_0) \\ \sqrt{nh}h^a \{\hat{\beta}_{n,\lambda}(t) - \beta_0(t) + (W_\lambda \beta_0)(t_0)\} \end{bmatrix} \rightarrow N(0, \Phi).$$

Since  $n^{1/2}h^{k(1+b)} = o(1)$ , we can get that  $nh^{4k} = o(1)$ . Then, we have

$$\begin{aligned} |(W_\lambda \beta_0)(t_0)| &= \left| \sum_{j=1}^n \frac{b_j \lambda \rho_j}{1 + \lambda \rho_j} h_j(t_0) \right| \leq c_h \lambda \left\{ \sum_{j=1}^\infty b_j^2 \rho_j^2 \right\}^{1/2} \left\{ \sum_{j=1}^\infty \frac{j^{2a}}{(1 + \lambda \rho_j)^2} \right\}^{1/2} \\ &= O(\lambda h^{-a-1/2}) = o(1). \end{aligned}$$

Hence, it leads to  $\sqrt{nh}^{a+1/2} \{W_\lambda(\beta_0)\}(t) = o(1)$ . Thus, the conclusion follows directly.

## C.4 Proof of Theorem 3.4

By Theorem 3.2 and the proof of Theorem 3.3, we have

$$n^{1/2}h^{a+1/2} \sup_{s \in \mathbb{I}} |\hat{\beta}_{n,\lambda}(s) - \beta_0(s) - \tilde{\mathcal{S}}_n(\alpha_0)(s)| = o_p(1),$$

where

$$\begin{aligned}
\tilde{\mathcal{S}}_n(\alpha_0)(s) &\equiv \frac{1}{n} \int_0^\tau \sum_{i=1}^n \left( T_{W_i}(s) - \frac{E[\mathcal{Y}(t) \exp\{\eta_{\alpha_0}(W)\} T_W(s)]}{E[\mathcal{Y}(t) \exp\{\eta_{\alpha_0}(W)\}]} \right) dM_i(t) \\
&= \frac{1}{n} \int_{\mathbb{I}} K(s, u) \int_0^\tau \sum_{i=1}^n \left( X_i(u) - \frac{E[\mathcal{Y}(t) \exp\{\eta_{\alpha_0}(W)\} X(u)]}{E[\mathcal{Y}(t) \exp\{\eta_{\alpha_0}(W)\}]} \right) dM_i(t) du \\
&\quad - \omega(s) \{ \Sigma - \Omega + V(G, W_\lambda G^\top) \}^{-1} \frac{1}{n} \sum_{i=1}^n \int_0^\tau \{ Z_i - V(G, \pi_{X_i}) \} dM_i(t) \\
&\equiv \tilde{\mathcal{S}}_{n1}(\alpha_0)(s) - \tilde{\mathcal{S}}_{n2}(\alpha_0)(s).
\end{aligned}$$

We will show the theorem through the following two steps.

(i) Denote  $H_n(s) = \sqrt{nh} h^a \tilde{\mathcal{S}}_{n1}(\alpha_0)(s)$ . The first step is to show that  $H_n(s)$  converges to the Gaussian process  $\mathcal{G}(t)$  in the Hilbert Space  $\mathcal{H}^{(m)}$  with the inner product  $V(\cdot, \cdot)$ , where  $h_j, j = 1, 2, \dots$ , are the orthonormal bases. Direct calculations yield

$$\begin{aligned}
H_n(s) &= \frac{h^{1/2+a}}{\sqrt{n}} \int_{\mathbb{I}} K(s, u) \int_0^\tau \sum_{i=1}^n \left( X_i(u) - \frac{E[\mathcal{Y}(t) \exp\{\eta_{\alpha_0}(W)\} X(u)]}{E[\mathcal{Y}(t) \exp\{\eta_{\alpha_0}(W)\}]} \right) dM_i(t) du \\
&= \frac{1}{\sqrt{n}} \sum_{j=1}^\infty \int_{\mathbb{I}} \frac{h_j(u) h_j(s) h^{1/2+a}}{1 + \lambda \rho_j} \int_0^\tau \sum_{i=1}^n \left( X_i(u) - \frac{E[\mathcal{Y}(t) \exp\{\eta_{\alpha_0}(W)\} X(u)]}{E[\mathcal{Y}(t) \exp\{\eta_{\alpha_0}(W)\}]} \right) dM_i(t) du.
\end{aligned}$$

From Theorem 1.8.4 in van der Vaart and Wellner (1996), to prove that  $H_n(t)$  converges to the Gaussian process  $\mathcal{G}(t)$  in the Hilbert Space  $\mathcal{H}^m$ , we only need to prove that  $H_n(\cdot)$  is asymptotically finite-dimensional and  $V(H_n, h_j)$  converges in distribution to  $V(\mathcal{G}, h_j)$ . It follows from the definition of  $H_n(\cdot)$  that

$$\begin{aligned}
\sum_{j=1}^\infty V(H_n, h_j)^2 &= \sum_{j=1}^\infty \frac{h^{1+2a}}{(1 + \lambda \rho_j)^2} \left\{ \frac{1}{\sqrt{n}} \sum_{i=1}^n \int_{\mathbb{I}} h_j(u) \int_0^\tau \left( X_i(u) \right. \right. \\
&\quad \left. \left. - \frac{E[\mathcal{Y}(t) \exp\{\eta_{\alpha_0}(W)\} X(u)]}{E[\mathcal{Y}(t) \exp\{\eta_{\alpha_0}(W)\}]} \right) dM_i(t) du \right\}^2.
\end{aligned}$$

It is easy to verify that

$$\frac{1}{\sqrt{n}} \sum_{i=1}^n \int_{\mathbb{I}} h_j(u) \int_0^\tau \left( X_i(u) - \frac{E[\mathcal{Y}(t) \exp\{\eta_{\alpha_0}(W)\} X(u)]}{E[\mathcal{Y}(t) \exp\{\eta_{\alpha_0}(W)\}]} \right) dM_i(t) du$$

is asymptotically tight and bounded by  $cj^a$ . Besides, we have  $\sum_j \frac{h^{1+2a} j^{2a}}{(1+\lambda\rho_j)^2} \asymp \int_0^\infty \frac{x^{2a}}{(1+x^{2k})^2} dx < \infty$ . Then for every  $\varepsilon > 0$ , there exists  $J_0$  such that  $\sum_{j \geq J_0} \frac{h^{1+2a} j^{2a}}{(1+\lambda\rho_j)^2} < \varepsilon$ . Thus for any  $\varepsilon > 0$  and  $\delta > 0$ , we have

$$\limsup_n P \left( \sum_{j \geq J_0} V(H_n, h_j)^2 > \varepsilon \right) < \delta.$$

Namely,  $H_n$  is asymptotically finite-dimensional.

Furthermore, it follows from the definitions of  $h_j$  and  $V(\cdot, \cdot)$  that

$$\begin{aligned} V(H_n, h_j) &= \frac{h^{1/2+a}}{(1+\lambda\rho_j)} \left\{ \frac{1}{\sqrt{n}} \sum_{i=1}^n \int_{\mathbb{I}} h_j(u) \int_0^\tau \left( X_i(u) - \frac{E[\mathcal{Y}(t) \exp\{\eta_{\alpha_0}(W)\} X(u)]}{E[\mathcal{Y}(t) \exp\{\eta_{\alpha_0}(W)\}]} \right) dM_i(t) du \right\} \\ &\xrightarrow{d} N \left( 0, \frac{h^{1+2a}}{(1+\lambda\rho_j)^2} \right). \end{aligned} \quad (\text{C.12})$$

Following the lines of the proof of Karhunen-Loève theorem (Alexanderian, 2015), we can get that

$$\mathcal{G}(t) = \sum_j \frac{h^{1/2+a}}{(1+\lambda\rho_j)} \eta_j h_j(t),$$

where  $\eta_j, j = 1, 2, \dots$ , are i.i.d standard normal random variables. Thus,  $V(\mathcal{G}, h_j)$  follows  $N(0, \frac{h^{1+2a}}{(1+\lambda\rho_j)^2})$ . From equation (C.12), we have that  $V(H_n, h_j)$  converges in distribution to  $V(\mathcal{G}, h_j)$ .

(ii) The second step is to show that  $\sqrt{n} h^{1/2+a} \tilde{\mathcal{S}}_{n2}(\alpha_0)(s)$  converges to zero in probability uniformly in  $s$ . It follows from the arguments in Cheng and Shang (2015, page 1379, lines 5–11) that  $\omega(s) = O(1)$ . Besides, since  $h \rightarrow 0$ ,  $\{\Sigma - \Omega + V(G, W_\lambda G^\top)\}^{-1} \rightarrow \{\Sigma - \Omega\}^{-1}$ ,

and  $n^{-1/2} \sum_{i=1}^n \int_0^\tau \{Z_i - V(G, \pi_{X_i})\} dM_i(t)$  converges to a normal distribution, we have

$$h^{a+1/2} \sqrt{n} \tilde{\mathcal{S}}_{n2}(\alpha_0)(s) \xrightarrow{p} 0 \text{ uniformly in } s.$$

Combining (i) and (ii) yields the conclusion of the theorem.

## C.5 Proof of Theorem 4.1

Define  $\alpha = \hat{\alpha}_{n,\lambda} - \alpha_0$ . It follows from Theorem 3.1 that for some  $M > 0$ ,  $\|\alpha\|_\lambda \leq Mr_n$  with probability approaching to one. Therefore, we can assume  $\|\alpha\|_\lambda \leq Mr_n$ . By the Taylor expansion, we can get that

$$\begin{aligned} l_{n,\lambda}(\alpha_0) - l_{n,\lambda}(\hat{\alpha}_{n,\lambda}) &= -\mathcal{S}_{n,\lambda}(\hat{\alpha}_{n,\lambda})\alpha + \int_0^1 \int_0^1 s D\mathcal{S}_{n,\lambda}(\hat{\alpha}_{n,\lambda} - ss'\alpha)\alpha \alpha \, ds \, ds' \\ &= \int_0^1 \int_0^1 s \{D\mathcal{S}_{n,\lambda}(\hat{\alpha}_{n,\lambda} - ss'\alpha) - D\mathcal{S}_{n,\lambda}(\alpha_0)\} \alpha \alpha \, ds \, ds' + \frac{1}{2} D\mathcal{S}_{n,\lambda}(\alpha_0) \alpha \alpha. \end{aligned} \quad (\text{C.13})$$

It follows from Lemma B.1 that

$$\begin{aligned} l_{n,\lambda}(\alpha_0) - l_{n,\lambda}(\hat{\alpha}_{n,\lambda}) &= \int_0^1 \int_0^1 s [D\mathcal{S}_{n,\lambda}(\hat{\alpha}_{n,\lambda} - ss'\alpha) - D\mathcal{S}_{n,\lambda}(\alpha_0)] \alpha \alpha \, ds \, ds' \\ &\quad + \frac{1}{2} [D\mathcal{S}_{n,\lambda}(\alpha_0) - D\mathcal{S}_\lambda(\alpha_0)] \alpha \alpha - \frac{1}{2} \|\alpha\|_\lambda^2 \\ &\equiv I_1 + I_2 - \frac{1}{2} \|\alpha\|_\lambda^2. \end{aligned}$$

To get the order of  $I_1$ , we define  $\alpha' = \hat{\alpha}_{n,\lambda} - ss'\alpha - \alpha_0 = (1 - ss')\alpha$ , where  $0 \leq s, s' \leq 1$ .

Direct calculations yield that

$$\begin{aligned}
& |[D\mathcal{S}_{n,\lambda}(\hat{\alpha}_{n,\lambda} - ss'\alpha) - D\mathcal{S}_{n,\lambda}(\alpha_0)]\alpha\alpha'| = |D^2\mathcal{S}_{n,\lambda}(\alpha_0 + \delta\alpha')\alpha\alpha\alpha'| \\
& \asymp \left| \frac{1}{n} \sum_{i=1}^n \Delta_i \left[ \frac{\sum_j \mathcal{Y}_j(Y_i) \exp\{\eta_{\alpha_0}(W_j)\} \eta_\alpha(W_j) \eta_\alpha(W_j) \eta_{\alpha'}(W_j)}{nS_1^{(0)}(Y_i, \alpha_0)} \right. \right. \\
& \quad - \frac{\sum_j \mathcal{Y}_j(Y_i) \exp\{\eta_{\alpha_0}(W_j)\} \eta_\alpha(W_j) \eta_\alpha(W_j) \sum_j \mathcal{Y}_j(Y_i) \exp\{\eta_{\alpha_0}(W_j)\} \eta_{\alpha'}(W_j)}{[nS_1^{(0)}(Y_i, \alpha_0)]^2} \\
& \quad - 2 \frac{\sum_j \mathcal{Y}_j(Y_i) \exp\{\eta_{\alpha_0}(W_j)\} \eta_\alpha(W_j) \eta_{\alpha'}(W_j) \sum_j \mathcal{Y}_j(Y_i) \exp\{\eta_{\alpha_0}(W_j)\} \eta_\alpha(W_j)}{[nS_1^{(0)}(Y_i, \alpha_0)]^2} \\
& \quad \left. \left. + 2 \frac{\{\sum_j \mathcal{Y}_j(Y_i) \exp\{\eta_{\alpha_0}(W_j)\} \eta_\alpha(W_j)\}^2 \sum_j \mathcal{Y}_j(Y_i) \exp\{\eta_{\alpha_0}(W_j)\} \eta_{\alpha'}(W_j)}{[nS_1^{(0)}(Y_i, \alpha_0)]^3} \right] \right| \\
& \lesssim \sup_{t \in \mathbb{I}} \left| \frac{\sum_j \mathcal{Y}_j(t) \exp\{\eta_{\alpha_0}(W_j)\} \eta_\alpha(W_j) \eta_\alpha(W_j) \eta_{\alpha'}(W_j)}{nS_1^{(0)}(t, \alpha_0)} \right| \\
& + \sup_{t \in \mathbb{I}} \left| \frac{\sum_j \mathcal{Y}_j(t) \exp\{\eta_{\alpha_0}(W_j)\} \eta_\alpha(W_j) \eta_\alpha(W_j) \sum_j \mathcal{Y}_j(t) \exp\{\eta_{\alpha_0}(W_j)\} \eta_{\alpha'}(W_j)}{\{nS_1^{(0)}(t, \alpha_0)\}^2} \right| \\
& + 2 \sup_{t \in \mathbb{I}} \left| \frac{\sum_j \mathcal{Y}_j(t) \exp\{\eta_{\alpha_0}(W_j)\} \eta_\alpha(W_j) \eta_{\alpha'}(W_j) \sum_j \mathcal{Y}_j(t) \exp\{\eta_{\alpha_0}(W_j)\} \eta_\alpha(W_j)}{\{nS_1^{(0)}(t, \alpha_0)\}^2} \right| \\
& + 2 \sup_{t \in \mathbb{I}} \left| \frac{\{\sum_j \mathcal{Y}_j(t) \exp\{\eta_{\alpha_0}(W_j)\} \eta_\alpha(W_j)\}^2 \sum_j \mathcal{Y}_j(t) \exp\{\eta_{\alpha_0}(W_j)\} \eta_{\alpha'}(W_j)}{[nS_1^{(0)}(t, \alpha_0)]^3} \right| \\
& \equiv I_{11} + I_{12} + I_{13} + I_{14},
\end{aligned}$$

where  $0 \leq \delta \leq 1$ . Define  $\Gamma = \cap_{i=1}^n A_{ni}$ , where

$$A_{ni} = \{\|Z_i\|_2 \leq c \log(n), \|X_i\|_{L^2} \leq c \log(n), \exp\{\eta_{\alpha_0}(W_i)\} \leq c \log(n)\}$$



for a constant  $c$ . For  $I_{11}$ , we have

$$\begin{aligned}
I_{11} &= \sup_{t \in \mathbb{I}} \left| \frac{n^{-1} \sum_{j=1}^n \mathcal{Y}_j(t) \exp\{\eta_{\alpha_0}(W_j)\} \eta_{\alpha}(W_j) \eta_{\alpha}(W_j) \eta_{\alpha'}(W_j)}{s_1^{(0)}(t, \alpha_0)} \right| \\
&\leq \left| \frac{n^{-1} \sum_{j=1}^n \exp\{\eta_{\alpha_0}(W_j)\} \eta_{\alpha}(W_j) \eta_{\alpha}(W_j) \eta_{\alpha'}(W_j)}{s_1^{(0)}(\tau, \alpha_0)} \right| \\
&\leq \frac{Mr_n}{ns_1^{(0)}(\tau, \alpha_0)} \left| \sum_{j=1}^n \exp\{\eta_{\alpha_0}(W_j)\} \eta_{\alpha}(W_j) \eta_{\alpha}(W_j) \|\mathcal{R}_{W_j}\|_{\lambda} \right| \\
&\leq \frac{Mr_n}{ns_1^{(0)}(\tau, \alpha_0)} \left| \left\langle \sum_{j=1}^n \exp\{\eta_{\alpha_0}(W_j)\} \eta_{\alpha}(W_j) \|\mathcal{R}_{W_j}\|_{\lambda} \mathcal{R}_{W_j}, \alpha \right\rangle_{\lambda} \right|.
\end{aligned}$$

Let  $d_n = \kappa M h^{-(2a+1)} r_n$ , and  $\tilde{\alpha} = d_n^{-1} \alpha$ , where  $\kappa$  is given in Lemma B.3. Note that  $\tilde{\alpha} \in \mathcal{F}_{p_n}$ ,

where  $p_n = \kappa^{-2} h^{2a+1-2k} > 1$  for large enough  $n$ . Denote

$$\phi_n(Y_i, \Delta_i, W_i; \tilde{\alpha}) = \frac{\exp\{\eta_{\alpha_0}(W_i)\} \eta_{\tilde{\alpha}}(W_i) \|\mathcal{R}_{W_i}\|_{\lambda} \mathcal{R}_{W_i}}{\sqrt{2c_r} \{c \log(n)\}^3 h^{-(a+1/2)}} I_{A_{ni}}.$$

Then it can be shown that

$$|\phi_n(Y_i, \Delta_i, W_i; \tilde{\alpha}_1) - \phi_n(Y_i, \Delta_i, W_i; \tilde{\alpha}_2)| \leq \|\tilde{\alpha}_1 - \tilde{\alpha}_2\|_e.$$

It follows from Lemma B.5 that with probability approaching to one,

$$\begin{aligned}
&\left\| n^{-1/2} \sum_{j=1}^n [\exp\{\eta_{\alpha_0}(W_j)\} \eta_{\tilde{\alpha}}(W_j) \|\mathcal{R}_{W_j}\|_{\lambda} \mathcal{R}_{W_j} I_{A_{nj}} - E \exp\{\eta_{\alpha_0}(W_j)\} \eta_{\tilde{\alpha}}(W_j) \|\mathcal{R}_{W_j}\|_{\lambda} \mathcal{R}_{W_j} I_{A_{nj}}] \right\|_{\lambda} \\
&\lesssim p_n^{1/(4m)} \{h^{-1} \log \log(n)\}^{1/2} \{c \log(n)\}^3 h^{-(a+1/2)}.
\end{aligned}$$

Therefore, we have

$$\begin{aligned}
&\left\| \sum_{j=1}^n [\exp\{\eta_{\alpha_0}(W_j)\} \eta_{\alpha}(W_j) \|\mathcal{R}_{W_j}\|_{\lambda} \mathcal{R}_{W_j} I_{A_{nj}} - E \exp\{\eta_{\alpha_0}(W_j)\} \eta_{\alpha}(W_j) \|\mathcal{R}_{W_j}\|_{\lambda} \mathcal{R}_{W_j} I_{A_{nj}}] \right\|_{\lambda} \\
&\lesssim n^{1/2} p_n^{1/(4m)} \{h^{-1} \log \log(n)\}^{1/2} \{c \log(n)\}^3 h^{-(a+1/2)} d_n \\
&= c^3 M r_n n^{1/2} \kappa^{1-1/(2m)} h^{-(2a+3/2)+(2a+1-2k)/(4m)} \{\log(n)\}^3 \{\log \log(n)\}^{1/2}.
\end{aligned}$$

It follows from the Cauchy-Schwarz inequality, Lemma B.2, and Lemma B.4 that

$$\begin{aligned}
& |E[\exp\{\eta_{\alpha_0}(W_j)\}\eta_{\alpha}(W_j)\|\mathcal{R}_{W_j}\|_{\lambda}\langle\mathcal{R}_{W_j},\alpha\rangle_{\lambda}]| \\
& \leq (E[\exp\{\eta_{\alpha_0}(W_j)\}]^2)^{1/2}\{E\|\mathcal{R}_W\|_{\lambda}^2\}\{E\langle\mathcal{R}_{W_j},\alpha\rangle_{\lambda}^4\}^{1/2} \\
& \lesssim (E[\exp\{\eta_{\alpha_0}(W_j)\}]^2)^{1/2}\sqrt{c_r}h^{-1/2}\sqrt{\|\alpha\|_{\lambda}^4} \\
& \lesssim (E[\exp\{\eta_{\alpha_0}(W_j)\}]^2)^{1/2}h^{-1/2}M^2r_n^2.
\end{aligned}$$

Thus, with probability approaching to one,

$$|I_{11}| \lesssim (r_n^3n^{-1/2}h^{-(2a+3/2)+(2a+1-2k)/(4m)}\{\log(n)\}^3\{\log\log(n)\}^{1/2} + h^{-1/2}r_n^3).$$

Similarly, we can prove that

$$I_{12} = O_p(r_n^3n^{-1/2}h^{-(2a+3/2)+(2a+1-2k)/(4m)}\{\log(n)\}^3\{\log\log(n)\}^{1/2} + h^{-1/2}r_n^3),$$

$$I_{13} = O_p(r_n^3n^{-1/2}h^{-(2a+3/2)+(2a+1-2k)/(4m)}\{\log(n)\}^3\{\log\log(n)\}^{1/2} + h^{-1/2}r_n^3),$$

$$I_{14} = O_p(r_n^3n^{-1/2}h^{-(2a+3/2)+(2a+1-2k)/(4m)}\{\log(n)\}^3\{\log\log(n)\}^{1/2} + h^{-1/2}r_n^3). \text{ Therefore, we}$$

have

$$I_1 = O_p(r_n^3n^{-1/2}h^{-(2a+3/2)+(2a+1-2k)/(4m)}\{\log(n)\}^3\{\log\log(n)\}^{1/2} + h^{-1/2}r_n^3) = o_p(n^{-1}h^{-1/2}).$$

It follows from equation (C.7) that

$$\begin{aligned}
2|I_2| &= |[D\mathcal{S}_{n,\lambda}(\alpha_0) - D\mathcal{S}_{\lambda}(\alpha_0)]\alpha\alpha| \\
&= O_p(n^{-1/2}h^{-(a+1)-\frac{2k-2a-1}{4m}}\{\log(n)\}^2\{\log\log(n)\}^{1/2}r_n^2) = o_p(n^{-1}h^{-1/2}).
\end{aligned}$$

Therefore, we have

$$-2n\text{PLRT}_{n,\lambda} = n\|\hat{\alpha}_{n,\lambda} - \alpha_0\|_{\lambda}^2 + o_p(h^{-1/2}).$$

It follows from Theorem 3.2 and  $n^{1/2}a_n = o(1)$  that

$$-2n\text{PLRT}_{n,\lambda} = n\|\mathcal{S}_{n,\lambda}(\alpha_0)\|_\lambda^2(1 + o_p(1)) + o_p(h^{-1/2}).$$

Direct calculations yield that

$$\begin{aligned} & n\|\mathcal{S}_{n,\lambda}(\alpha_0)\|_\lambda^2 \\ &= \frac{1}{n} \left\| \sum_{i=1}^n \int_0^\tau \left[ \mathcal{R}_{W_i} - \frac{n^{-1} \sum_{j=1}^n \mathcal{Y}_j(t) \exp\{\eta_{\alpha_0}(W_j)\} \mathcal{R}_{W_j}}{S_1^{(0)}(t, \alpha_0)} \right] dM_i(t) - \mathcal{P}_\lambda \alpha_0 \right\|_\lambda^2 \\ &= \frac{1}{n} \left\| \sum_{i=1}^n \int_0^\tau \left[ \mathcal{R}_{W_i} - \frac{n^{-1} \sum_{j=1}^n \mathcal{Y}_j(t) \exp\{\eta_{\alpha_0}(W_j)\} \mathcal{R}_{W_j}}{S_1^{(0)}(t, \alpha_0)} \right] dM_i(t) \right\|_\lambda^2 \\ &\quad - 2 \left\langle \frac{1}{n} \sum_{i=1}^n \int_0^\tau \left[ \mathcal{R}_{W_i} - \frac{n^{-1} \sum_{j=1}^n \mathcal{Y}_j(t) \exp\{\eta_{\alpha_0}(W_j)\} \mathcal{R}_{W_j}}{S_1^{(0)}(t, \alpha_0)} \right] dM_i(t), \mathcal{P}_\lambda \alpha_0 \right\rangle_\lambda + n\|\mathcal{P}_\lambda \alpha_0\|_\lambda^2 \\ &\equiv J_1 + J_2 + J_3. \end{aligned}$$

For  $J_1$  and  $J_2$ , it follows from Condition (C1) that

$$\begin{aligned} J_1 &= \frac{1}{n} \left\| \sum_{i=1}^n \int_0^\tau \left[ \mathcal{R}_{W_i} - \frac{n^{-1} \sum_{j=1}^n \mathcal{Y}_j(t) \exp\{\eta_{\alpha_0}(W_j)\} \mathcal{R}_{W_j}}{S_1^{(0)}(t, \alpha_0)} \right] dM_i(t) \right\|_\lambda^2 \\ &= \frac{1}{n} \left\| \sum_{i=1}^n \int_0^\tau \left[ \mathcal{R}_{W_i} - \frac{E\mathcal{Y}_j(t) \exp\{\eta_{\alpha_0}(W_j)\} \mathcal{R}_{W_j}}{s_1^{(0)}(t, \alpha_0)} \right] dM_i(t) \right\|_\lambda^2 + O_p(n^{-1}h^{-1-2a}) \\ &= \frac{1}{n} \left\| \sum_{i=1}^n \int_0^\tau \left[ \mathcal{R}_{W_i} - \frac{E\mathcal{Y}_j(t) \exp\{\eta_{\alpha_0}(W_j)\} \mathcal{R}_{W_j}}{s_1^{(0)}(t, \alpha_0)} \right] dM_i(t) \right\|_\lambda^2 + o_p(1), \end{aligned}$$

and

$$\begin{aligned} & \left| \frac{J_2}{2} \right| = \left| \left\langle \frac{1}{n} \sum_{i=1}^n \int_0^\tau \left[ \mathcal{R}_{W_i} - \frac{n^{-1} \sum_{j=1}^n \mathcal{Y}_j(t) \exp\{\eta_{\alpha_0}(W_j)\} \mathcal{R}_{W_j}}{S_1^{(0)}(t, \alpha_0)} \right] dM_i(t), \mathcal{P}_\lambda \alpha_0 \right\rangle_\lambda \right| \\ &\leq \left| \left\langle \frac{1}{n} \sum_{i=1}^n \int_0^\tau \left[ \mathcal{R}_{W_i} - \frac{E\mathcal{Y}_j(t) \exp\{\eta_{\alpha_0}(W_j)\} \mathcal{R}_{W_j}}{s_1^{(0)}(t, \alpha_0)} \right] dM_i(t), \mathcal{P}_\lambda \alpha_0 \right\rangle_\lambda \right| \\ &+ \left| \left\langle \frac{1}{n} \sum_{i=1}^n \int_0^\tau \left[ \frac{E\mathcal{Y}_j(t) \exp\{\eta_{\alpha_0}(W_j)\} \mathcal{R}_{W_j}}{s_1^{(0)}(t, \alpha_0)} - \frac{n^{-1} \sum_{j=1}^n \mathcal{Y}_j(t) \exp\{\eta_{\alpha_0}(W_j)\} \mathcal{R}_{W_j}}{S_1^{(0)}(t, \alpha_0)} \right] dM_i(t), \mathcal{P}_\lambda \alpha_0 \right\rangle_\lambda \right| \\ &= \left| \left\langle \frac{1}{n} \sum_{i=1}^n \int_0^\tau \left[ \mathcal{R}_{W_i} - \frac{E\mathcal{Y}_j(t) \exp\{\eta_{\alpha_0}(W_j)\} \mathcal{R}_{W_j}}{s_1^{(0)}(t, \alpha_0)} \right] dM_i(t), \mathcal{P}_\lambda \alpha_0 \right\rangle_\lambda \right| + O_p(n^{-1/2}h^{-1/2-a})\|\mathcal{P}_\lambda \alpha_0\|_\lambda. \end{aligned}$$

Denote  $\beta_0 = \sum_j b_j h_j$ . Since  $J(\beta_0, \beta_0) = \sum_j b_j^2 \rho_j < \infty$ , and  $\lambda = o(1)$ , it follows from the Lebesgue dominated convergence theorem that

$$\begin{aligned} & E \left[ \left\langle \sum_{i=1}^n \int_0^\tau \left\{ \mathcal{R}_{W_i} - \frac{E[\mathcal{Y}_j(t) \exp \{ \eta_{\alpha_0}(W_j) \} \mathcal{R}_{W_j}]}{s_1^{(0)}(t, \alpha_0)} \right\} dM_i(t), \mathcal{P}_\lambda \alpha_0 \right\rangle_\lambda^2 \right] \\ &= n E \left[ \int_0^\tau \left\{ \int_{\mathbb{I}} [X(t) - E\{X(t)|T=v, \Delta=1\}] W_\lambda(\beta_0)(t) dt \right\}^2 \mathcal{Y}(v) \exp\{\eta_{\alpha_0}(W)\} h_0(v) dv \right] \\ &= n V(W_\lambda(\beta_0), W_\lambda(\beta_0)) \leq n \|W_\lambda(\beta_0)\|_m = n \lambda \sum_j b_j^2 \rho_j \frac{\lambda \rho_j}{(1 + \lambda \rho_j)} = o_p(n \lambda). \end{aligned}$$

Therefore, we have  $J_2 = o_p((n\lambda)^{1/2})(1 + (nh)^{-1/2}) = o_p((n\lambda)^{1/2})$ . Note that  $J_3 = n \|\mathcal{P}_\lambda \alpha_0\|_\lambda^2 = n \|W_\lambda(\beta_0)\|_m^2 = o(n\lambda)$ . Therefore, we have

$$\begin{aligned} & -2n \text{PLRT}_{n,\lambda} \\ &= \frac{1}{n} \left\| \sum_{i=1}^n \int_0^\tau \left( \mathcal{R}_{W_i} - \frac{E[\mathcal{Y}_j(t) \exp \{ \eta_{\alpha_0}(W_j) \} \mathcal{R}_{W_j}]}{s_1^{(0)}(t, \alpha_0)} \right) dM_i(t) \right\|_\lambda^2 + n \|W_\lambda(\beta_0)\|_m^2 + o_p(h^{-1/2}). \end{aligned}$$

Define  $R_i(t) = \mathcal{R}_{W_i} - E[\mathcal{Y}_j(t) \exp \{ \eta_{\alpha_0}(W_j) \} \mathcal{R}_{W_j}] / s_1^{(0)}(t, \alpha_0)$ . To get the asymptotic results of  $-2n \text{PLRT}_{n,\lambda}$ , we only need to figure out the properties of

$$\frac{1}{n} \left\| \sum_{i=1}^n \int_0^\tau R_i(t) dM_i(t) \right\|_\lambda^2 = \frac{1}{n} \sum_{i=1}^n \int_0^\tau \int_0^\tau \langle R_i(t), R_i(s) \rangle_\lambda dM_i(t) dM_i(s) + \frac{1}{n} \sum_{1 \leq i < j \leq n} W_{ij},$$

where  $W_{ij} = 2 \int_0^\tau \int_0^\tau \langle R_i(t), R_j(s) \rangle_\lambda dM_i(t) dM_j(s)$ . Write  $W_n = \sum_{1 \leq i < j \leq n} W_{ij}$ . So,  $W_n$  is clean (Jong, 1987). Next, we aim to derive the limiting distribution of  $W_n$ . Let  $\sigma_n^2 = \text{Var}(W_n)$ . Then

$$\begin{aligned} \sigma_n^2 &= \frac{n(n-1)}{2} E(W_{ij}^2) = 2n(n-1) E \left\{ \int_0^\tau \int_0^\tau \langle R_i(t), R_j(s) \rangle_\lambda dM_i(t) dM_j(s) \right\}^2 \\ &\asymp 2n(n-1) \left\{ \sum_{l=1}^\infty \frac{1}{(1 + \lambda \rho_l)^2} + 1 \right\} \asymp 2n^2 h^{-1} \sigma_\lambda^4 / \rho_\lambda^2. \end{aligned}$$

Define  $F_1$ ,  $F_2$ , and  $F_3$  as follows:

$$F_1 \equiv \sum_{i < j} E(W_{ij}^4), \quad F_2 \equiv \sum_{i < j < k} \{E(W_{ij}^2 W_{ik}^2) + E(W_{ji}^2 W_{jk}^2) + E(W_{ki}^2 W_{kj}^2)\}, \quad \text{and}$$

$$F_3 \equiv \sum_{i < j < k < l} \{E(W_{ij} W_{ik} W_{lj} W_{lk}) + E(W_{ij} W_{il} W_{kj} W_{kl}) + E(W_{ik} W_{il} W_{jk} W_{jl})\}.$$

By Proposition 3.2 of Jong (1987), if  $F_1, F_2, F_3$  are all of lower order than  $\sigma_n^4$ , then  $\sigma_n^{-1} W_n$  converges weakly to the standard normal distribution. Now, we study the order of each  $F_i, i = 1, 2, 3$ . First, observe that

$$\begin{aligned} E(W_{ij}^4) &= 16E \left\{ \int_0^\tau \int_0^\tau \langle R_i(t), R_j(s) \rangle_\lambda dM_i(t) dM_j(s) \right\}^4 \\ &= 16 \int_0^\tau \int_0^\tau \int_0^\tau \int_0^\tau \int_0^\tau \int_0^\tau \int_0^\tau \int_0^\tau E \langle R_i(t_1), R_j(s_1) \rangle_\lambda \langle R_i(t_2), R_j(s_2) \rangle_\lambda \langle R_i(t_3), R_j(s_3) \rangle_\lambda \\ &\quad \langle R_i(t_4), R_j(s_4) \rangle_\lambda \left\{ dM_i(t_1) dM_j(s_1) dM_i(t_2) dM_j(s_2) dM_i(t_3) dM_j(s_3) dM_i(t_4) dM_j(s_4) \right\} \\ &= O(h^{-4}), \end{aligned}$$

which implies  $F_1 = O(n^2 h^{-4})$ . Next, by the Cauchy-Schwarz inequity,

$$E(W_{ij}^2 W_{ik}^2) \leq \{E(W_{ij}^4)\}^{1/2} \{E(W_{ik}^4)\}^{1/2} = O(h^{-4}),$$

which yields  $F_2 = O(n^3 h^{-4})$ . A straightforward calculation yields that

$$E(W_{ij} W_{ik} W_{lj} W_{lk}) \sim 16 \sum_{j=1}^{\infty} \frac{1}{(1 + \lambda \rho_j)^4} = O(h^{-1}).$$

Therefore,  $F_3 = O(n^4 h^{-1})$ . Combining the fact that  $\sigma_n^4 = (\sigma_n^2)^2 = O(n^4 h^{-2})$  with the assumptions that  $nh^2 \rightarrow \infty$  and  $h = o(1)$ ,  $F_1, F_2, F_3$  are of lower order than that of  $\sigma_n^4$ .

Hence, by Jong (1987),  $\sigma_n^{-1} W_n \xrightarrow{d} N(0, 1)$  as  $n \rightarrow \infty$ . Recall that  $\rho_\lambda^2 = \sum_{j=1}^{\infty} h / (1 + \lambda \rho_j)^2$ .

We have

$$\frac{1}{\sqrt{2h^{-1}n\rho_\lambda}} W_n \xrightarrow{d} N(0, 1). \quad (\text{C.14})$$

Lastly, we consider  $n^{-1} \sum_{i=1}^n \int_0^\tau \int_0^\tau \langle R_i(t), R_i(s) \rangle_\lambda dM_i(t) dM_i(s)$ . Through direct calculations, we can obtain that

$$E \left\{ \int_0^\tau \int_0^\tau \langle R_i(t), R_i(s) \rangle_\lambda dM_i(t) dM_i(s) \right\}^2 = O(\{E\|\mathcal{R}_{W_i}\|_\lambda^2\}^2) = O(h^{-2}).$$

Then,

$$\begin{aligned} & E \left\{ \sum_{i=1}^n \int_0^\tau \int_0^\tau \langle R_i(t), R_i(s) \rangle_\lambda dM_i(t) dM_i(s) - h^{-1}\sigma_\lambda^2 - 1 \right\}^2 \\ & \leq nE \left\{ \int_0^\tau \int_0^\tau \langle R_i(t), R_i(s) \rangle_\lambda dM_i(t) dM_i(s) \right\}^2 = O(nh^{-2}), \end{aligned}$$

where  $\sigma_\lambda^2 = \sum_{j=0}^\infty h/(1 + \lambda\rho_j)$ . Combining these gives

$$\frac{1}{n} \sum_{i=1}^n \int_0^\tau \int_0^\tau \langle R_i(t), R_i(s) \rangle_\lambda dM_i(t) dM_i(s) = 1 + h^{-1}\sigma_\lambda^2 + O_p\{(n^{1/2}h)^{-1}\}. \quad (\text{C.15})$$

By (C.14) and (C.15), we have  $n\|\mathcal{S}_{n,\lambda}(\alpha_0)\|_\lambda^2 = O_p(h^{-1})$  and therefore  $n^{1/2}\|\mathcal{S}_{n,\lambda}(\alpha_0)\|_\lambda = O_p(h^{-1/2})$ . As a result,

$$-2n\text{PLRT}_{n,\lambda} = \{n^{1/2}\|\mathcal{S}_{n,\lambda}(\alpha_0)\|_\lambda + o_p(1)\}^2 + o_p(h^{-1/2}) = n\|\mathcal{S}_{n,\lambda}(\alpha_0)\|_\lambda^2 + o_p(h^{-1/2}). \quad (\text{C.16})$$

In view of (C.14), (C.15) and (C.16), we conclude that as  $n \rightarrow \infty$ ,

$$(2h^{-1}\sigma_\lambda^4/\rho_\lambda^2)^{-1/2} \{-2n\gamma_\lambda \text{PLRT}_{n,\lambda} - n\gamma_\lambda \|W_\lambda \beta_0(t)\|_\lambda^2 - h^{-1}\sigma_\lambda^4/\rho_\lambda^2\} \xrightarrow{d} N(0, 1).$$

The proof of Theorem 4.1 is completed.

## C.6 Proof of Theorem 4.2

Throughout this proof, we only consider  $\alpha_{n_0} = \alpha_0 + \alpha_n$  for  $\alpha_n \in \mathcal{A}$  in  $H_1$ . To prove the theorem, we write

$$-2n \cdot \text{PLRT}_{n,\lambda} = -2n\{l_{n,\lambda}(\alpha_0) - l_{n,\lambda}(\alpha_{n_0})\} - 2n\{l_{n,\lambda}(\alpha_{n_0}) - l_{n,\lambda}(\hat{\alpha}_{n,\lambda})\} \equiv I_1 + I_2. \quad (\text{C.17})$$

We first consider  $I_1$ . For simplicity, we denote

$$\begin{aligned}
R_i &= \Delta_i \left[ \eta_{\alpha_0}(W_i) - \log \frac{1}{n} \sum_{j=1}^n \mathcal{Y}_j(Y_i) \exp\{\eta_{\alpha_0}(W_j)\} \right] \\
&\quad - \Delta_i \left[ \eta_{\alpha_{n_0}}(W_i) - \log \frac{1}{n} \sum_{j=1}^n \mathcal{Y}_j(Y_i) \exp\{\eta_{\alpha_{n_0}}(W_j)\} \right] \\
&= - \int_0^\tau \left[ \eta_{\alpha_n}(W_i) - \frac{\sum_{j=1}^n \mathcal{Y}_j(t) \exp\{\eta_{\alpha_0+s'\alpha_n}(W_j)\} \eta_{\alpha_n}(W_j)}{\sum_{j=1}^n \mathcal{Y}_j(t) \exp\{\eta_{\alpha_0+s'\alpha_n}(W_j)\}} \right] dN_i(t) \\
&= - \int_0^\tau \left[ \eta_{\alpha_n}(W_i) - \frac{E\mathcal{Y}_j(t) \exp\{\eta_{\alpha_0+s'\alpha_n}(W_j)\} \eta_{\alpha_n}(W_j)}{E\mathcal{Y}_j(t) \exp\{\eta_{\alpha_0+s'\alpha_n}(W_j)\}} \right] dN_i(t) \\
&\quad + \int_0^\tau \left[ \frac{\sum_{j=1}^n \mathcal{Y}_j(t) \exp\{\eta_{\alpha_0+s'\alpha_n}(W_j)\} \eta_{\alpha_n}(W_i)}{\sum_{j=1}^n \mathcal{Y}_j(t) \exp\{\eta_{\alpha_0+s'\alpha_n}(W_j)\}} - \frac{E[\mathcal{Y}_j(t) \exp\{\eta_{\alpha_0+s'\alpha_n}(W_j)\} \eta_{\alpha_n}(W_j)]}{E[\mathcal{Y}_j(t) \exp\{\eta_{\alpha_0+s'\alpha_n}(W_j)\}]} \right] dN_i(t) \\
&= - \int_0^\tau \left[ \eta_{\alpha_n}(W_i) - \frac{E\mathcal{Y}_j(t) \exp\{\eta_{\alpha_0+s'\alpha_n}(W_j)\} \eta_{\alpha_n}(W_j)}{E\mathcal{Y}_j(t) \exp\{\eta_{\alpha_0+s'\alpha_n}(W_j)\}} \right] dN_i(t) + o_p(\|\alpha_n\|_\lambda),
\end{aligned}$$

where  $0 \leq s' \leq 1$ . Then

$$E\{R_i^2\} \asymp E \int_0^\tau \text{Var}\{\eta_{\alpha_n}(W)|T=t, \Delta=1\} \mathcal{Y}(t) \exp\{\eta_{\alpha_0}(W)\} h_0(t) dt = O(\|\alpha_n\|_\lambda^2).$$

Therefore, we can get

$$E \left\{ \left| \sum_{i=1}^n (R_i - ER_i) \right|^2 \right\} \leq nE\{R_i^2\} = O(n\|\alpha_n\|_\lambda^2).$$

Combining these gives

$$n[l_{n,\lambda}(\alpha_0) - l_{n,\lambda}(\alpha_{n_0}) - E\{l_{n,\lambda}(\alpha_0) - l_{n,\lambda}(\alpha_{n_0})\}] = O_p(n^{1/2}\|\alpha_n\|_\lambda).$$

On the other hand, since  $D\mathcal{S}_\lambda(\alpha)\alpha_n\alpha_n < 0$  for any  $\alpha \in \mathcal{H}$ , there exists a constant  $c > 0$  such that  $\{D\mathcal{S}_\lambda(\alpha_{n_0}^*)\alpha_n\alpha_n\} \leq c\{D\mathcal{S}_\lambda(\alpha_{n_0})\alpha_n\alpha_n\} = -c\|\alpha_n\|_\lambda^2$ . Then, we have

$$\begin{aligned} E\{l_{n,\lambda}(\alpha_0) - l_{n,\lambda}(\alpha_{n_0})\} &= E\left\{\mathcal{S}_{n,\lambda}(\alpha_{n_0})(-\alpha_n) + \frac{1}{2}D\mathcal{S}_{n,\lambda}(\alpha_{n_0}^*)\alpha_n\alpha_n\right\} \\ &\leq \lambda J(\alpha_{n_0}, \alpha_n) - \frac{c\|\alpha_n\|_\lambda^2}{2} \leq \{J(\alpha_n, \alpha_n) + J(\alpha_0, \alpha_n)\} - \frac{c\|\alpha_n\|_\lambda^2}{2} \\ &\leq \{J(\alpha_n, \alpha_n) + J(\alpha_0, \alpha_0)^{1/2}J(\alpha_n, \alpha_n)^{1/2}\} - \frac{c\|\alpha_n\|_\lambda^2}{2} \\ &= O(\lambda) - \frac{c\|\alpha_n\|_\lambda^2}{2}. \end{aligned}$$

It then follows that

$$I_1 \geq n\|\alpha_n\|_\lambda^2 + O_p(n\lambda + n^{1/2}\|\alpha_n\|_\lambda) = n\|\alpha_n\|_\lambda^2\{1 + O_p(\lambda\|\alpha_n\|_\lambda^{-2} + n^{-1/2}\|\alpha_n\|_\lambda^{-1})\}. \quad (\text{C.18})$$

Second, we consider  $I_2$ . Under the alternative hypothesis,  $\|\hat{\alpha}_{n,\lambda} - \alpha_{n_0}\| = O_p\{(nh)^{-1/2} + h^k\}$ . By the joint functional Bahadur representation given in Theorem 3.2, we have

$$\inf_{n \geq N} \inf_{\alpha_n \in \mathcal{A}} P_{\alpha_{n_0}}(\|\hat{\alpha}_{n,\lambda} - \alpha_{n_0} - S_{n,\lambda}(\alpha_{n_0})\|_\lambda \leq Mr_n) \rightarrow 1, \quad (\text{C.19})$$

where  $r_n = (nh)^{-1/2} + h^k$ , and  $P_{\alpha_{n_0}}$  means that the probability relies on  $\alpha_{n_0}$ . Note that under the alternative hypothesis  $H_{1n}$ ,  $I_2$  is the same as (C.13) except one constant term  $-2n$ . Along the lines of Theorem 4.1, we can show that  $I_2$  has the same limiting distribution as given in Theorem 4.1, uniformly for any  $\alpha_n \in \mathcal{A}$ . In other words, uniformly over all  $\alpha_n \in \mathcal{A}$ ,

$$(2\nu_{n_0})^{-1/2}(I_2 - n\|W_\lambda\beta_{n_0}\|_m^2 - h^{-1}\sigma_{n_0,\lambda}^2) = O_p(1), \quad (\text{C.20})$$

where  $\nu_{n_0} = h^{-1}\sigma_{n_0,\lambda}^4/\rho_{n_0,\lambda}^2$ ,  $\sigma_{n_0,\lambda}^2$  and  $\rho_{n_0,\lambda}^2$  are defined as the same as  $\sigma_\lambda^2$  and  $\rho_\lambda^2$  but with eigenvalues and eigenfunctions obtained under  $\alpha_{n_0}$ . Next, let  $V_{n_0}(f, g) = \int_{\mathbb{I}} \int_{\mathbb{I}} F_{\alpha_{n_0}}(s, t)f(t)g(s) dt ds$



and  $V_0(f, g) = \int_{\mathbb{I}} \int_{\mathbb{I}} F_{\alpha_0}(s, t) f(t) g(s) dt ds$ , where  $F_{\alpha_0}(s, t) = F(s, t)$ , while  $F_{\alpha_{n_0}}(s, t)$  has the same formula as  $F_{\alpha_0}(s, t)$  but replacing  $\alpha_0$  with  $\alpha_{n_0}$ . Thus, for any  $f \in \mathcal{H}^{(m)}$ , there exists a constant  $c$  such that

$$\begin{aligned} |V_{n_0}(f, f) - V_0(f, f)| &= \left| \int_{\mathbb{I}} \int_{\mathbb{I}} [F_{\alpha_{n_0}}(s, t) - F_{\alpha_0}(s, t)] f(t) f(s) dt ds \right| \\ &\leq E \|\exp\{\alpha_n(W)\}\|_{\infty} V_0(f, f) \|\alpha_n\|_{\infty} = c V_0(f, f) \|\alpha_n\|_{\infty}. \end{aligned}$$

It follows from the Supplementary Material (page 56) of Shang and Cheng (2013) that

$$\sigma_{n_0, \lambda}^2 - \sigma_{\lambda}^2 = O(h^{-(a+1)/2} \|\alpha_n\|_{\lambda}). \quad (\text{C.21})$$

Combining (C.18), (C.20) and (C.21) gives

$$\begin{aligned} &(2\nu_n)^{-1/2} (-2nr_{\lambda} \text{PLRT}_{n, \lambda} - \nu_n) = (2\nu_n)^{-1/2} \{-r_{\lambda}(I_1 + I_2) - \nu_n\} \\ &= (2\nu_n)^{-1/2} r_{\lambda} (I_2 - n \|\mathcal{P}_{\lambda} \alpha_{n_0}\|_{\lambda}^2 - h^{-1} \sigma_{n_0, \lambda}^2) + (2\nu_n)^{-1/2} r_{\lambda} n \|\mathcal{P}_{\lambda} \alpha_{n_0}\|_{\lambda}^2 \\ &\quad + (2\nu_n)^{-1/2} r_{\lambda} I_1 + (2\nu_n)^{-1/2} r_{\lambda} h^{-1} (\sigma_{n_0, \lambda}^2 - \sigma_{\lambda}^2) \\ &\geq O_p(1) + (2\nu_n)^{-1/2} r_{\lambda} n \|\alpha_n\|_{\lambda}^2 \{1 + O_p(\lambda \|\alpha_n\|_{\lambda}^{-2} + n^{-1/2} \|\alpha_n\|_{\lambda}^{-1})\} \\ &\quad + O(h^{-3/2-a/2} \|\alpha_n\|_{\lambda}), \end{aligned}$$

where  $O_p(1)$  holds uniformly in  $\mathcal{A}$ ,  $\nu_n = h^{-1} \sigma_{\lambda}^4 / \rho_{\lambda}^2$ , and  $r_{\lambda}$  is defined in Theorem 4.1. Let  $\lambda \|\alpha_n\|_{\lambda}^{-2} \leq 1/c$ ,  $n^{-1/2} \|\alpha_n\|_{\lambda}^{-1} \leq 1/c$ ,  $ch^{-3/2-a/2} \|\alpha_n\|_{\lambda} \leq n \|\alpha_n\|_{\lambda}^2$ , and  $\|\alpha_n\|_{\lambda}^2 \geq c(nh^{1/2})^{-1}$  for a sufficiently small constant  $c$ . In other words,

$$|(2\nu_n)^{-1/2} (-2nr_{\lambda} \text{PLRT}_{n, \lambda} - \nu_n)| \geq c_{\alpha},$$

where  $c_{\alpha}$  is the critical value (based on  $N(0, 1)$ ) to  $H_0^{global}$  at nominal level  $\alpha$ . This leads to

$$\|\alpha_n\|_{\lambda}^2 \gtrsim \{h^{2k} + (nh^{1/2})^{-1}\}. \quad (\text{C.22})$$

Combining (C.19) and (C.22), we complete the proof of Theorem 4.2.

## References

- Alexanderian A. (2015). A brief note on the Karhunen-Loève expansion.  
<http://users.ices.utexas.edu/~alen/articles/KL.pdf>.
- Jong, D. P. (1987). A central limit theorem for generalized quadratic forms. *Probability Theory and Related Fields* **75**, 261-277.
- Kosorok, M. R. (2008). *Introduction to Empirical Processes and Semiparametric Inference*. Springer Science and Business Media.
- Shang, Z., and Cheng, G. (2013). Local and global asymptotic inference in smoothing spline models. *The Annals of Statistics* **41**, 2608-2638.
- Shang, Z. and Cheng, G. (2015). Nonparametric inference in generalized functional linear models. *The Annals of Statistics* **43**, 1742-1773.
- van der Vaart, A. W. and Wellner, J. A. (1996). *Weak Convergence and Empirical Processes with Applications to Statistics*. Springer-Verlag, New York.
